# Supplementary material for: Potentially toxic elements in the brains of people with multiple sclerosis
Source: PubMed Central journal article supplement (PMC9837144; doi:10.1038/s41598-022-27169-9), 2023-01-12

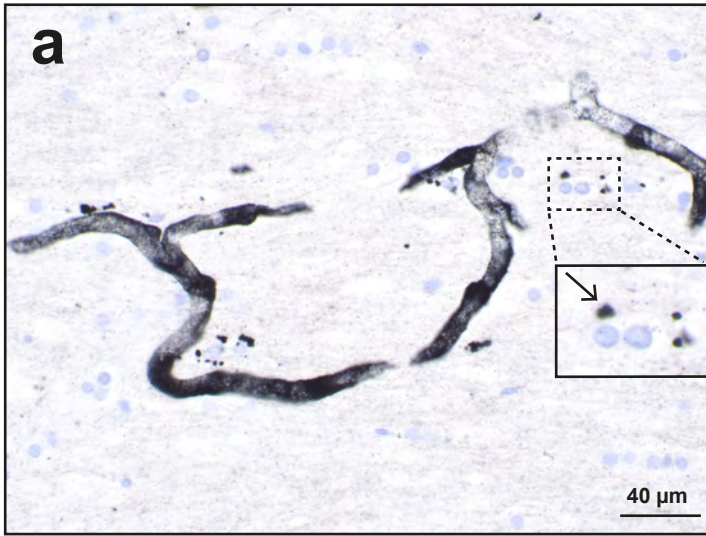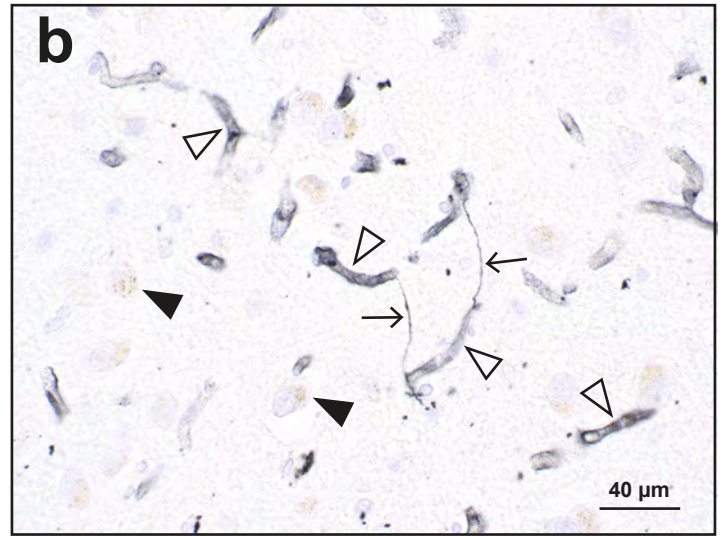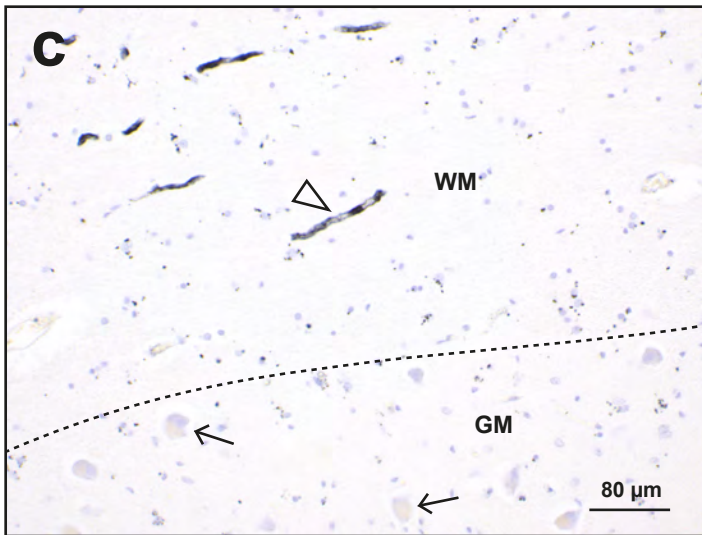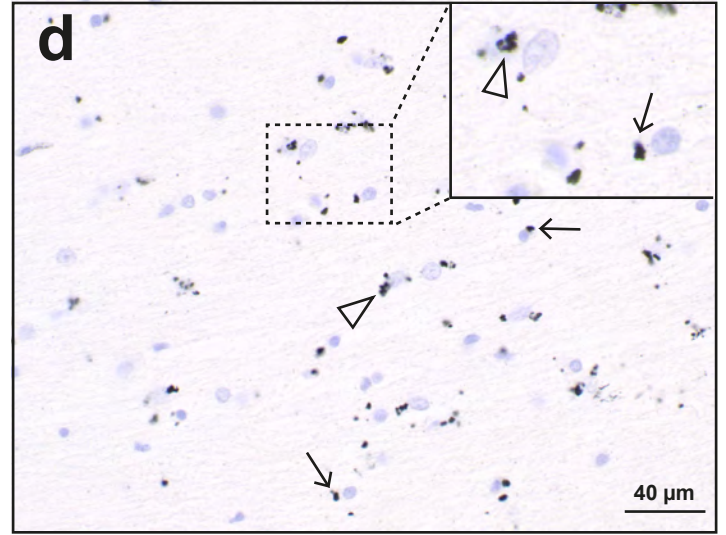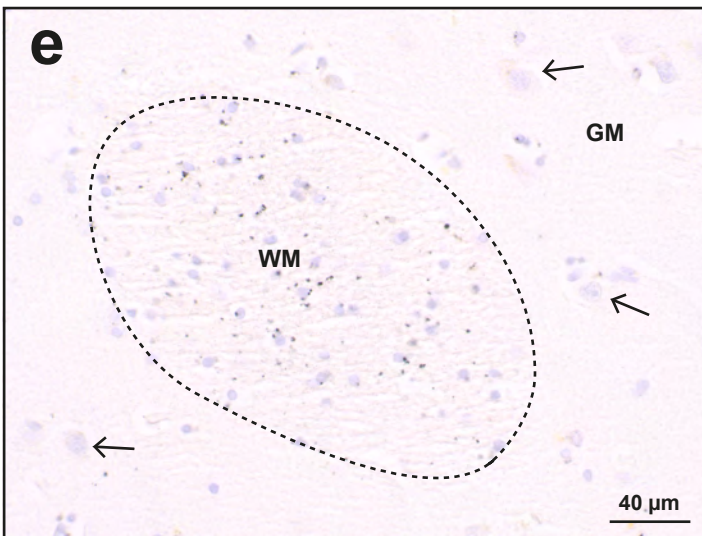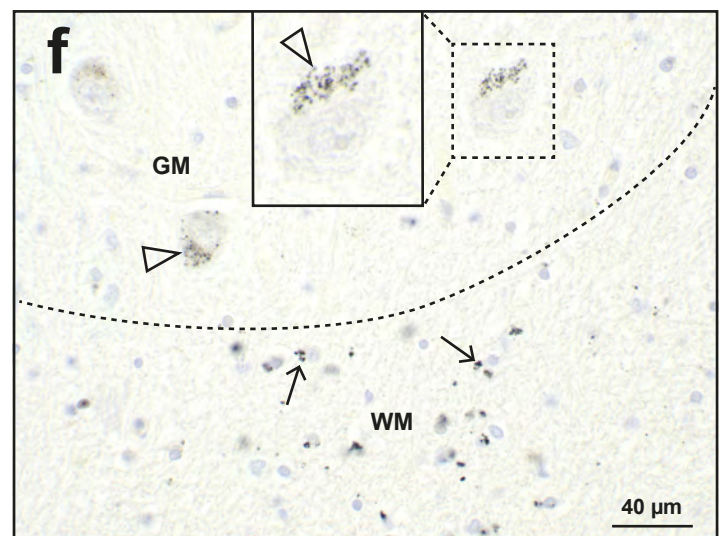

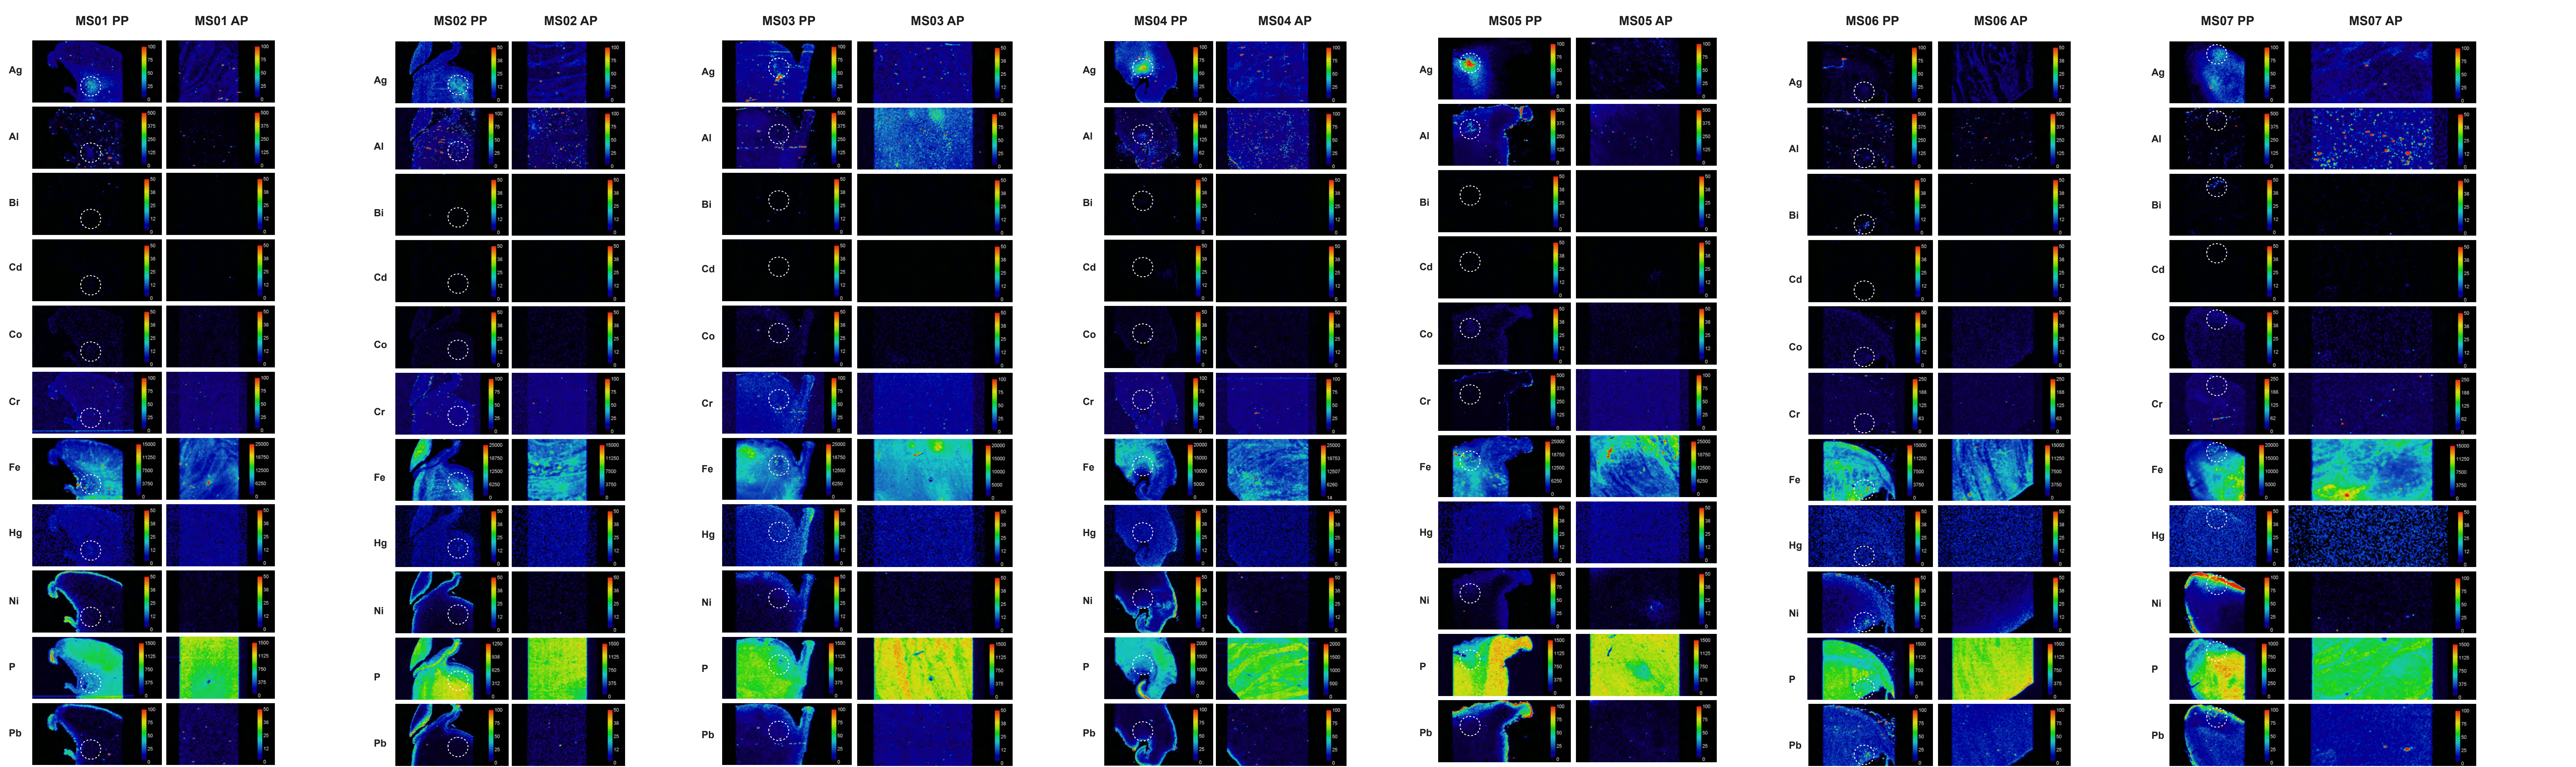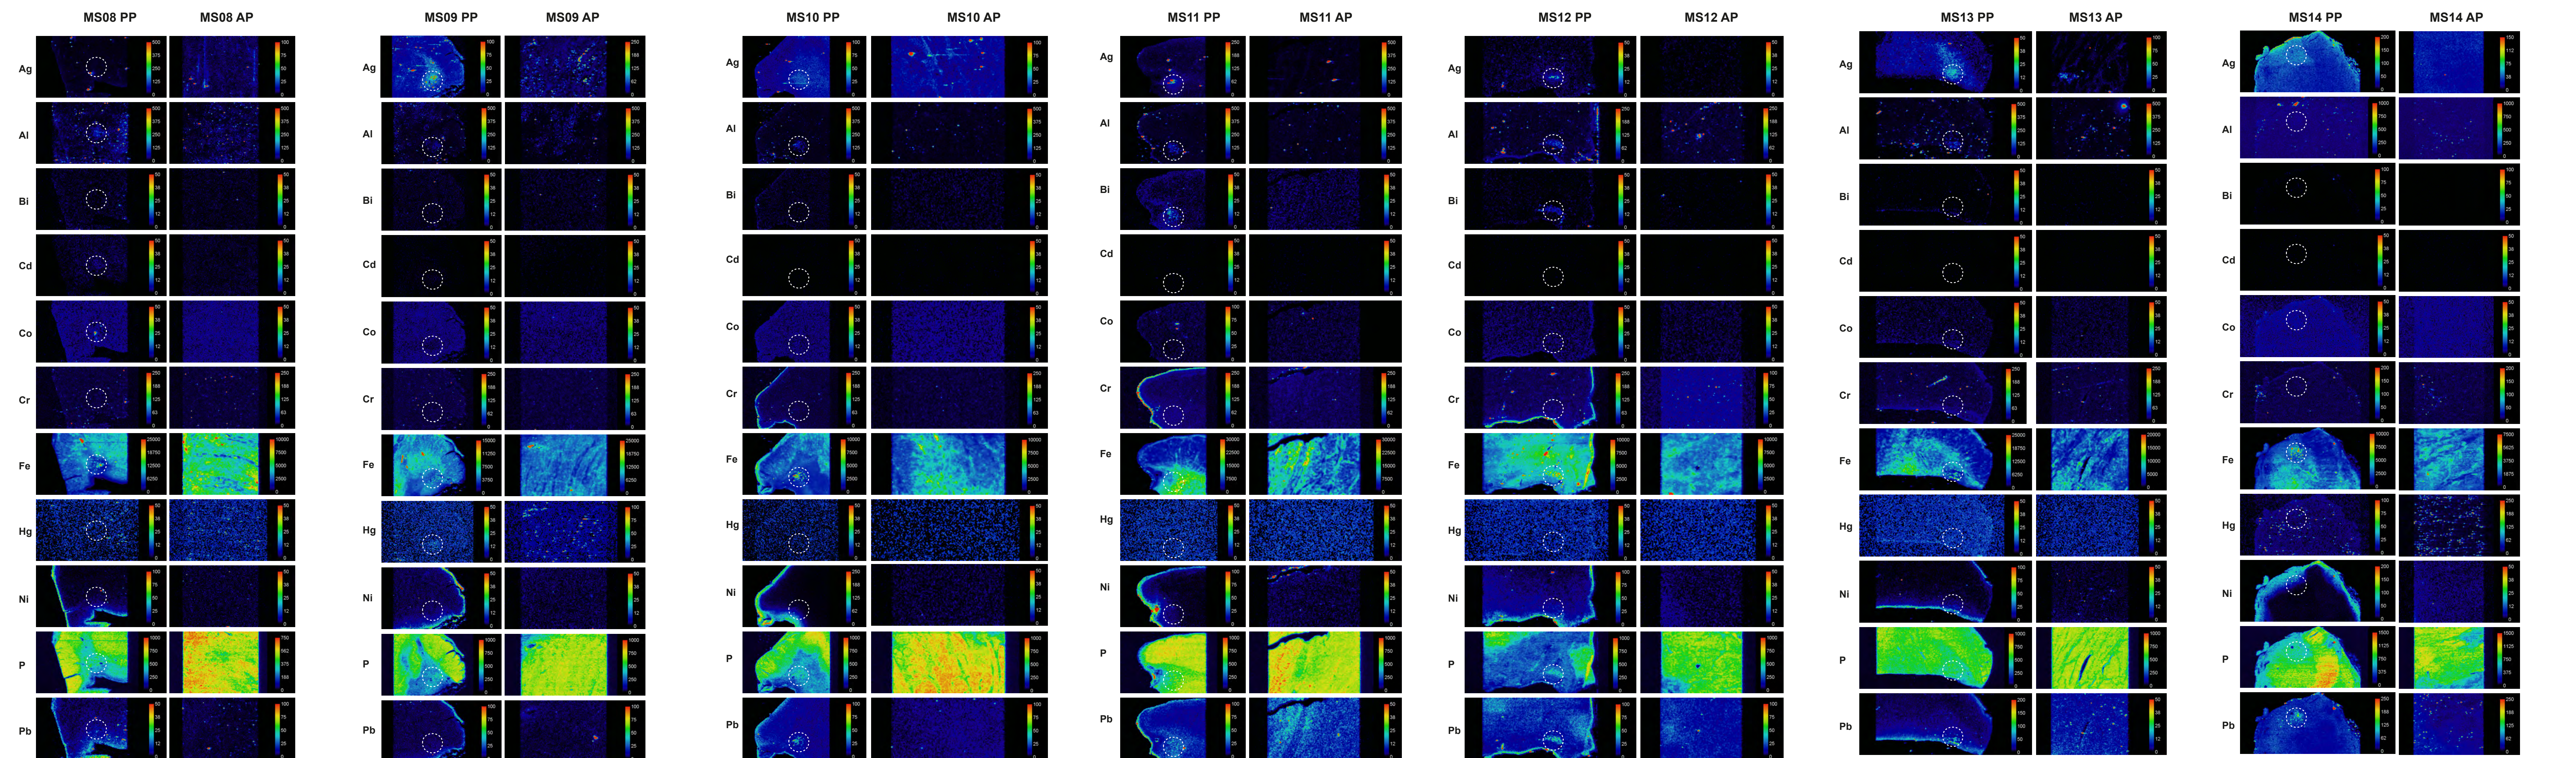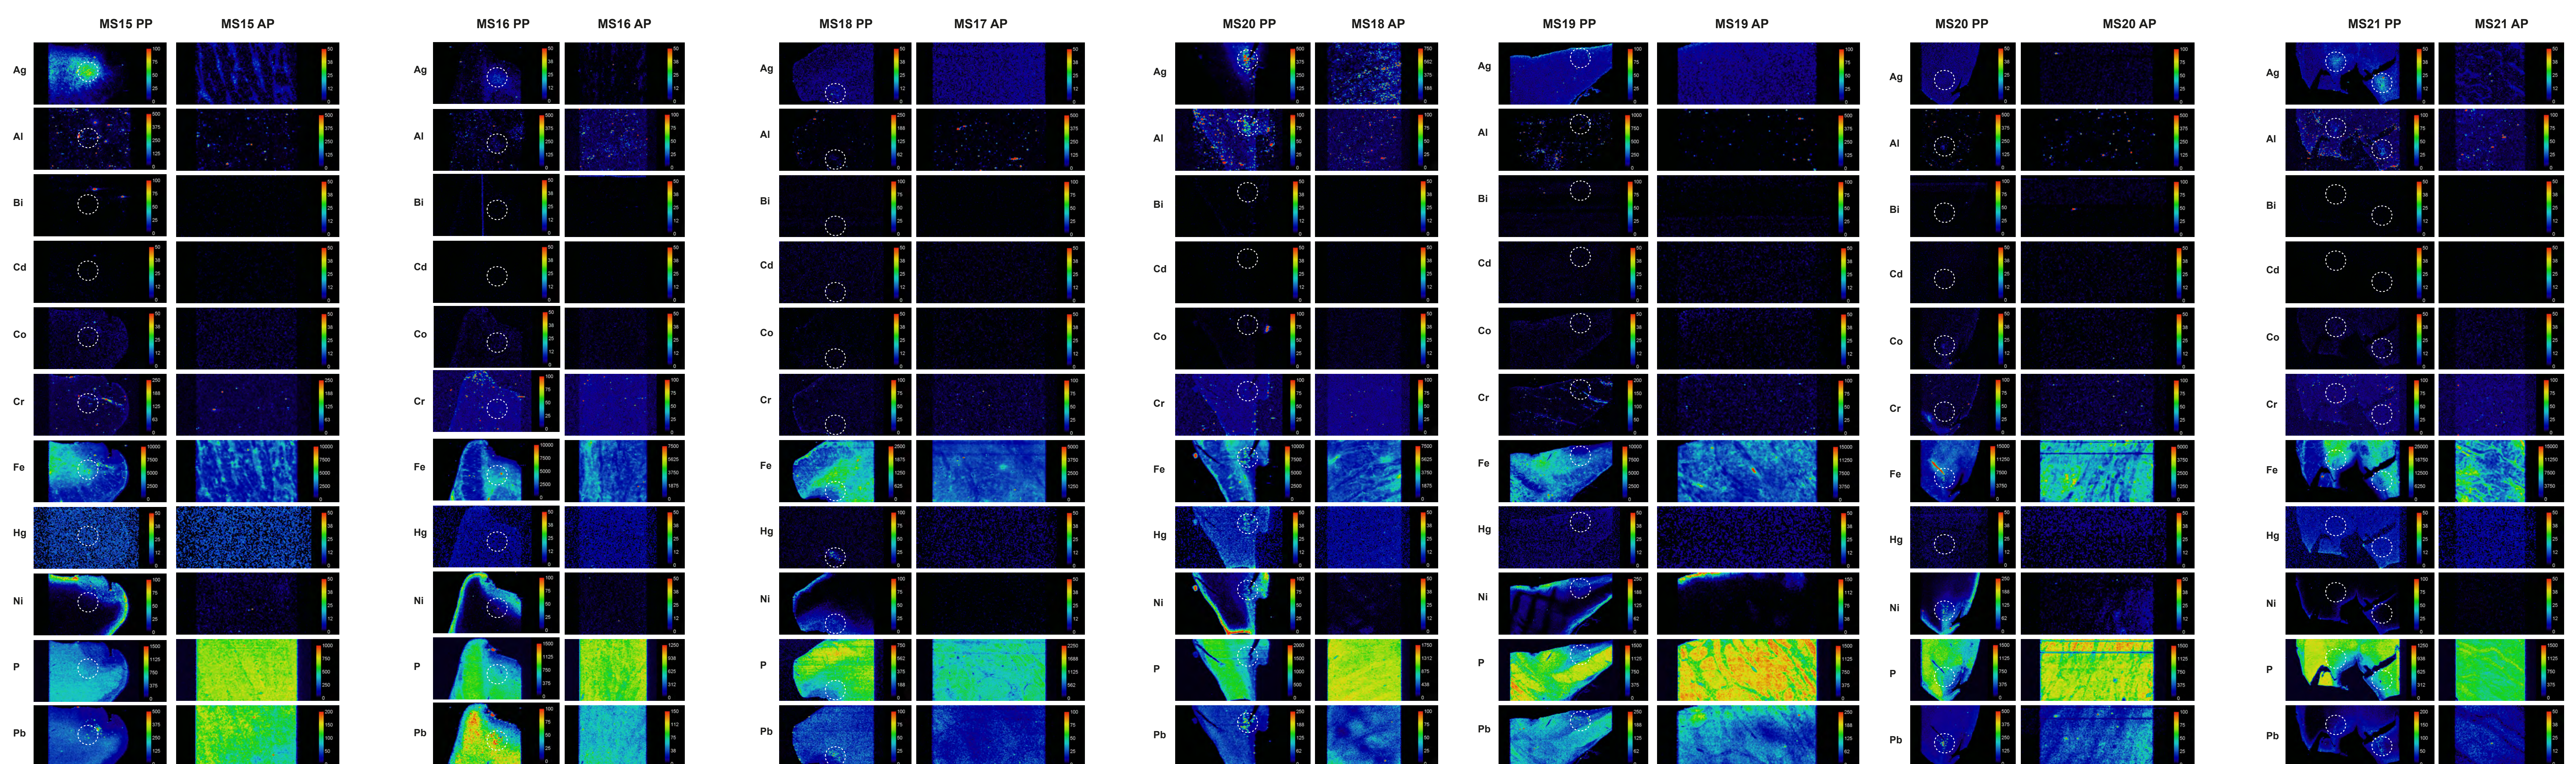

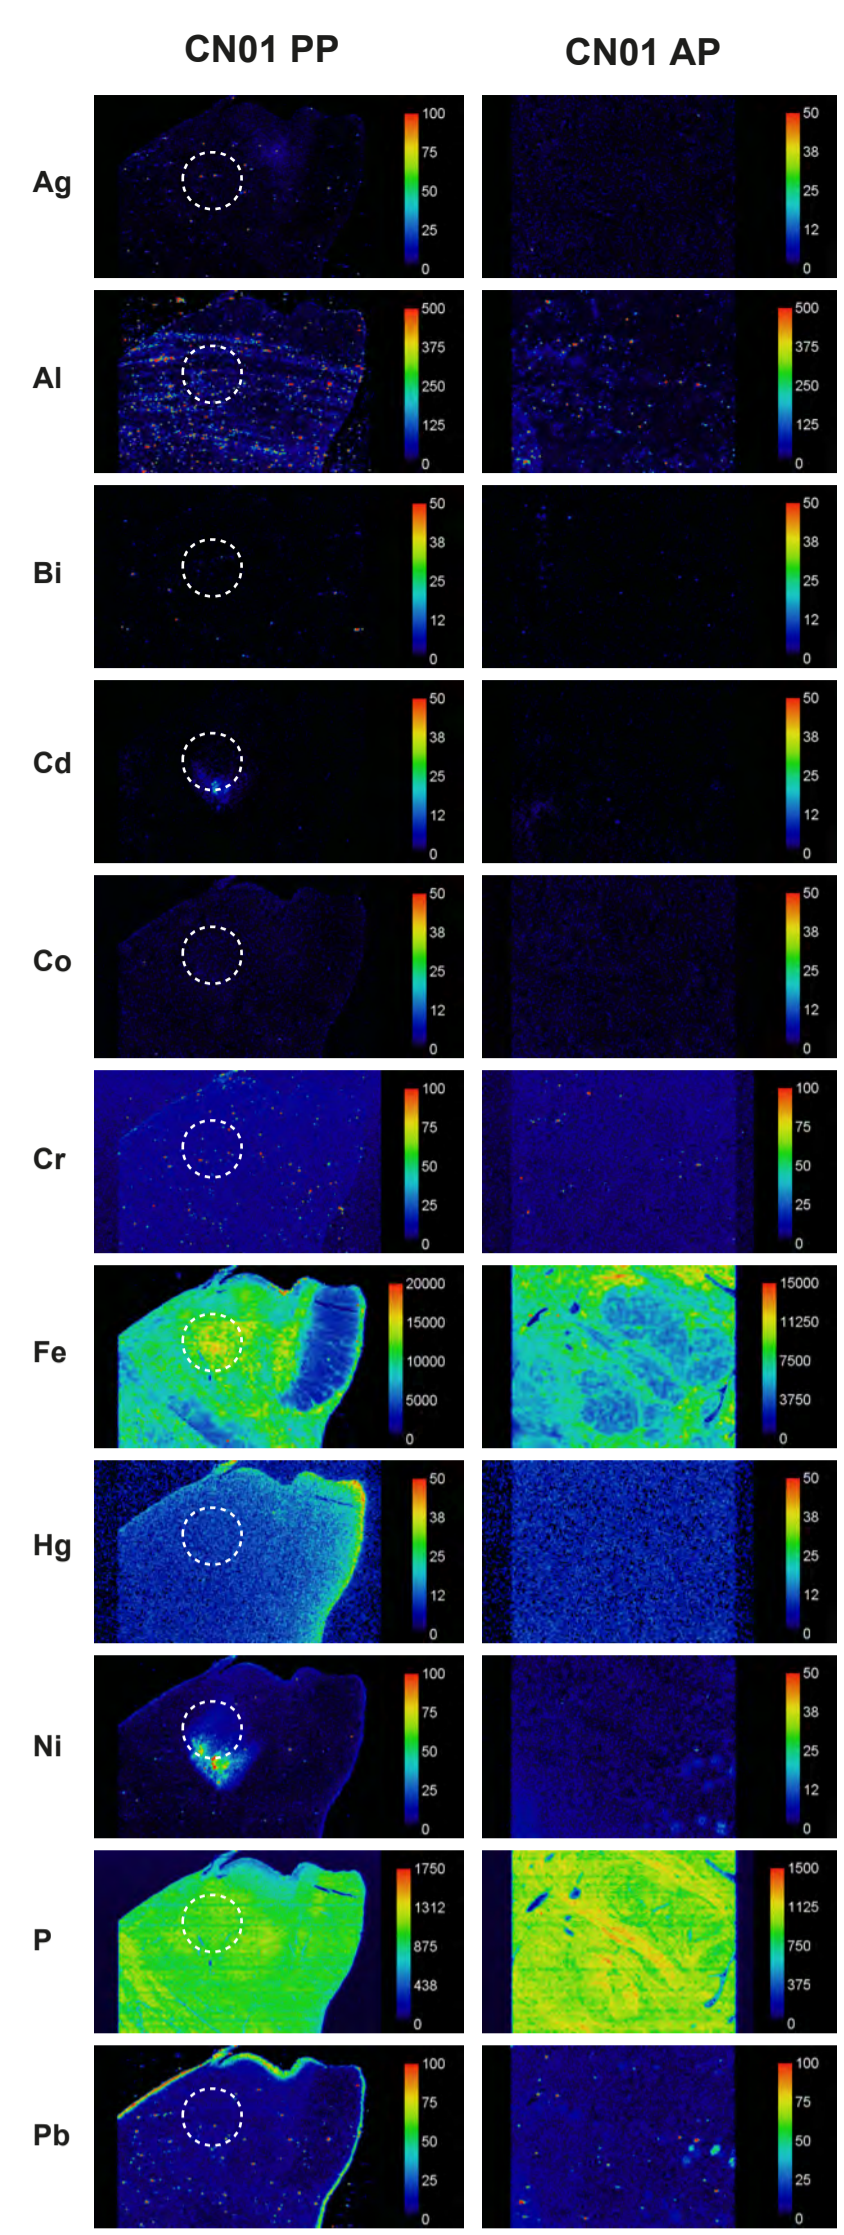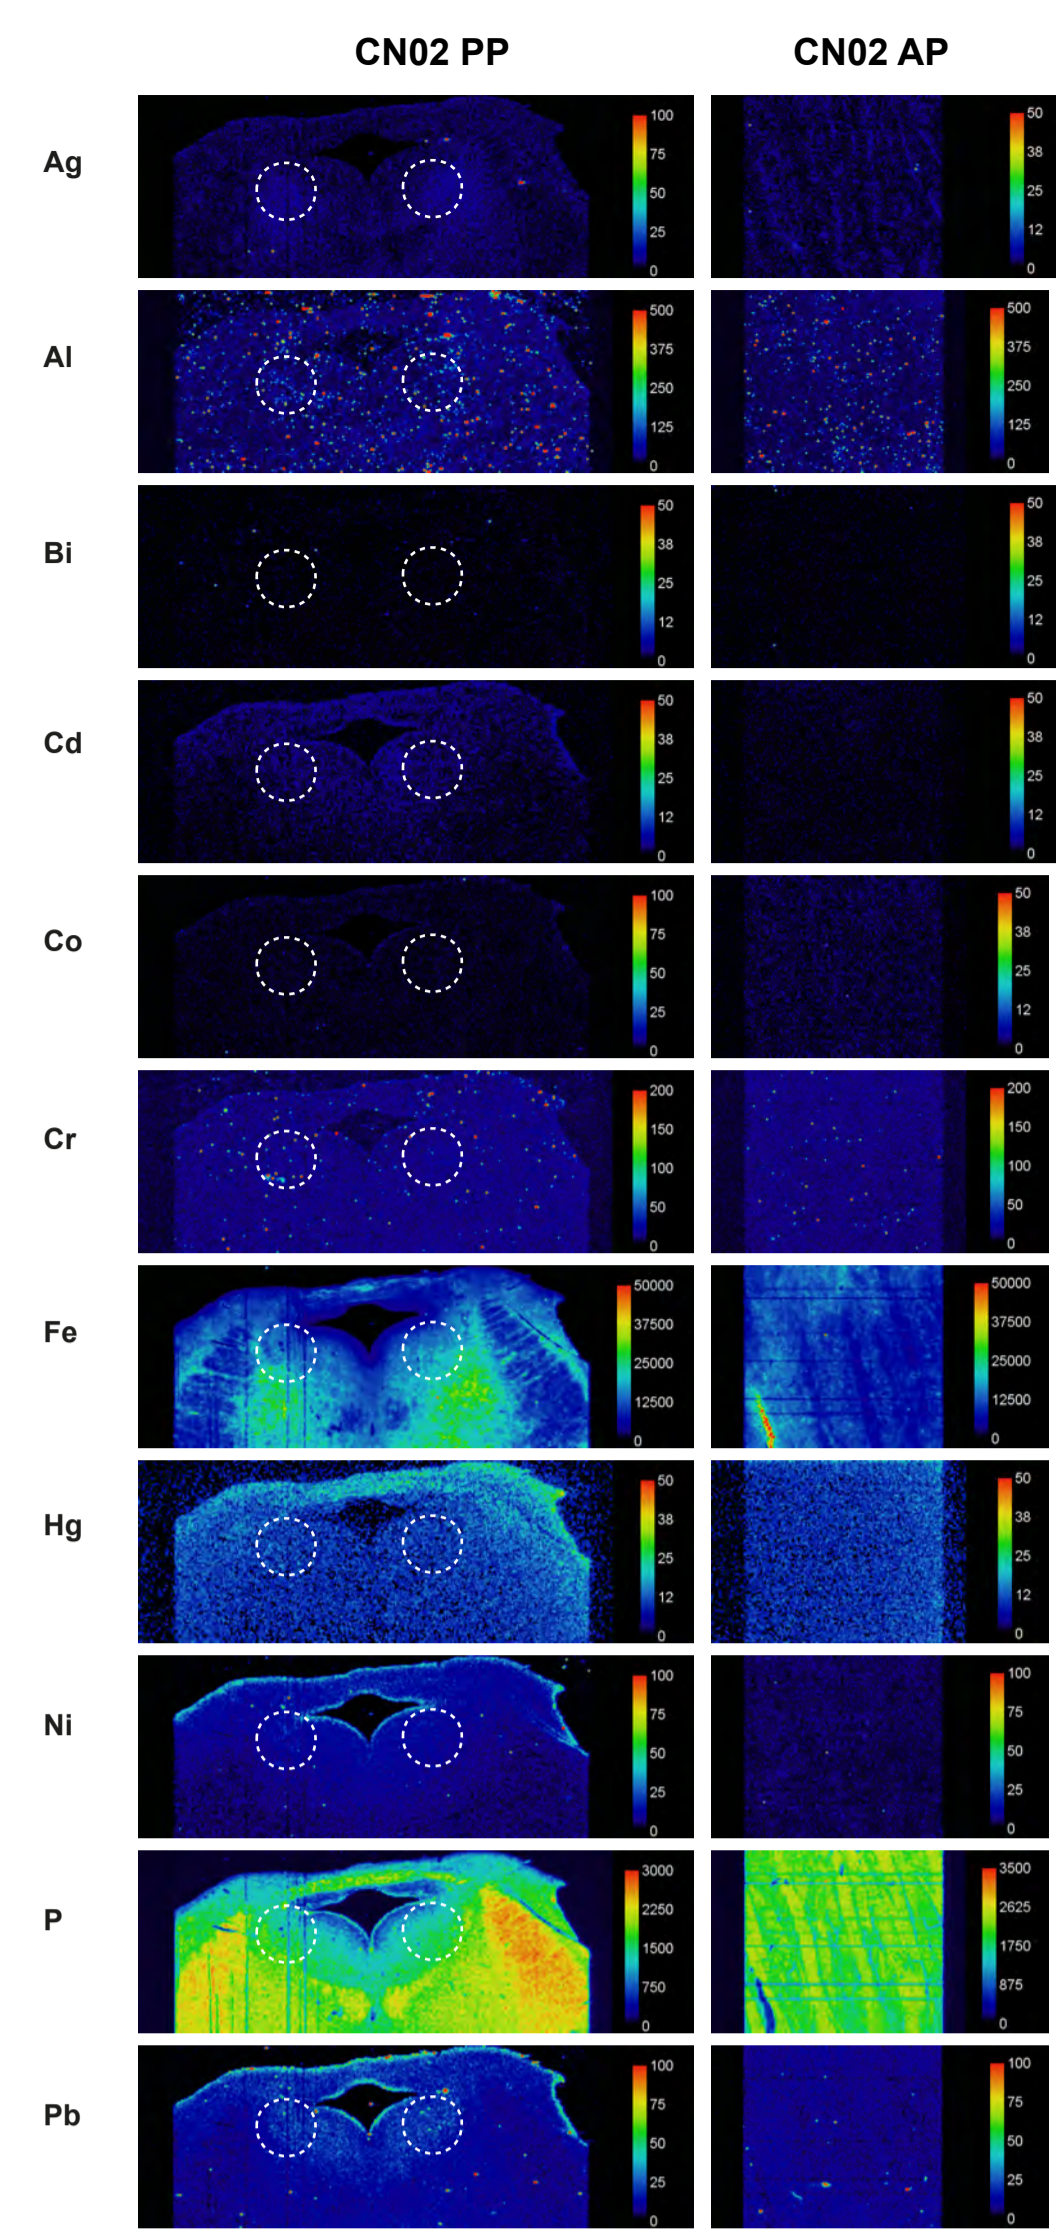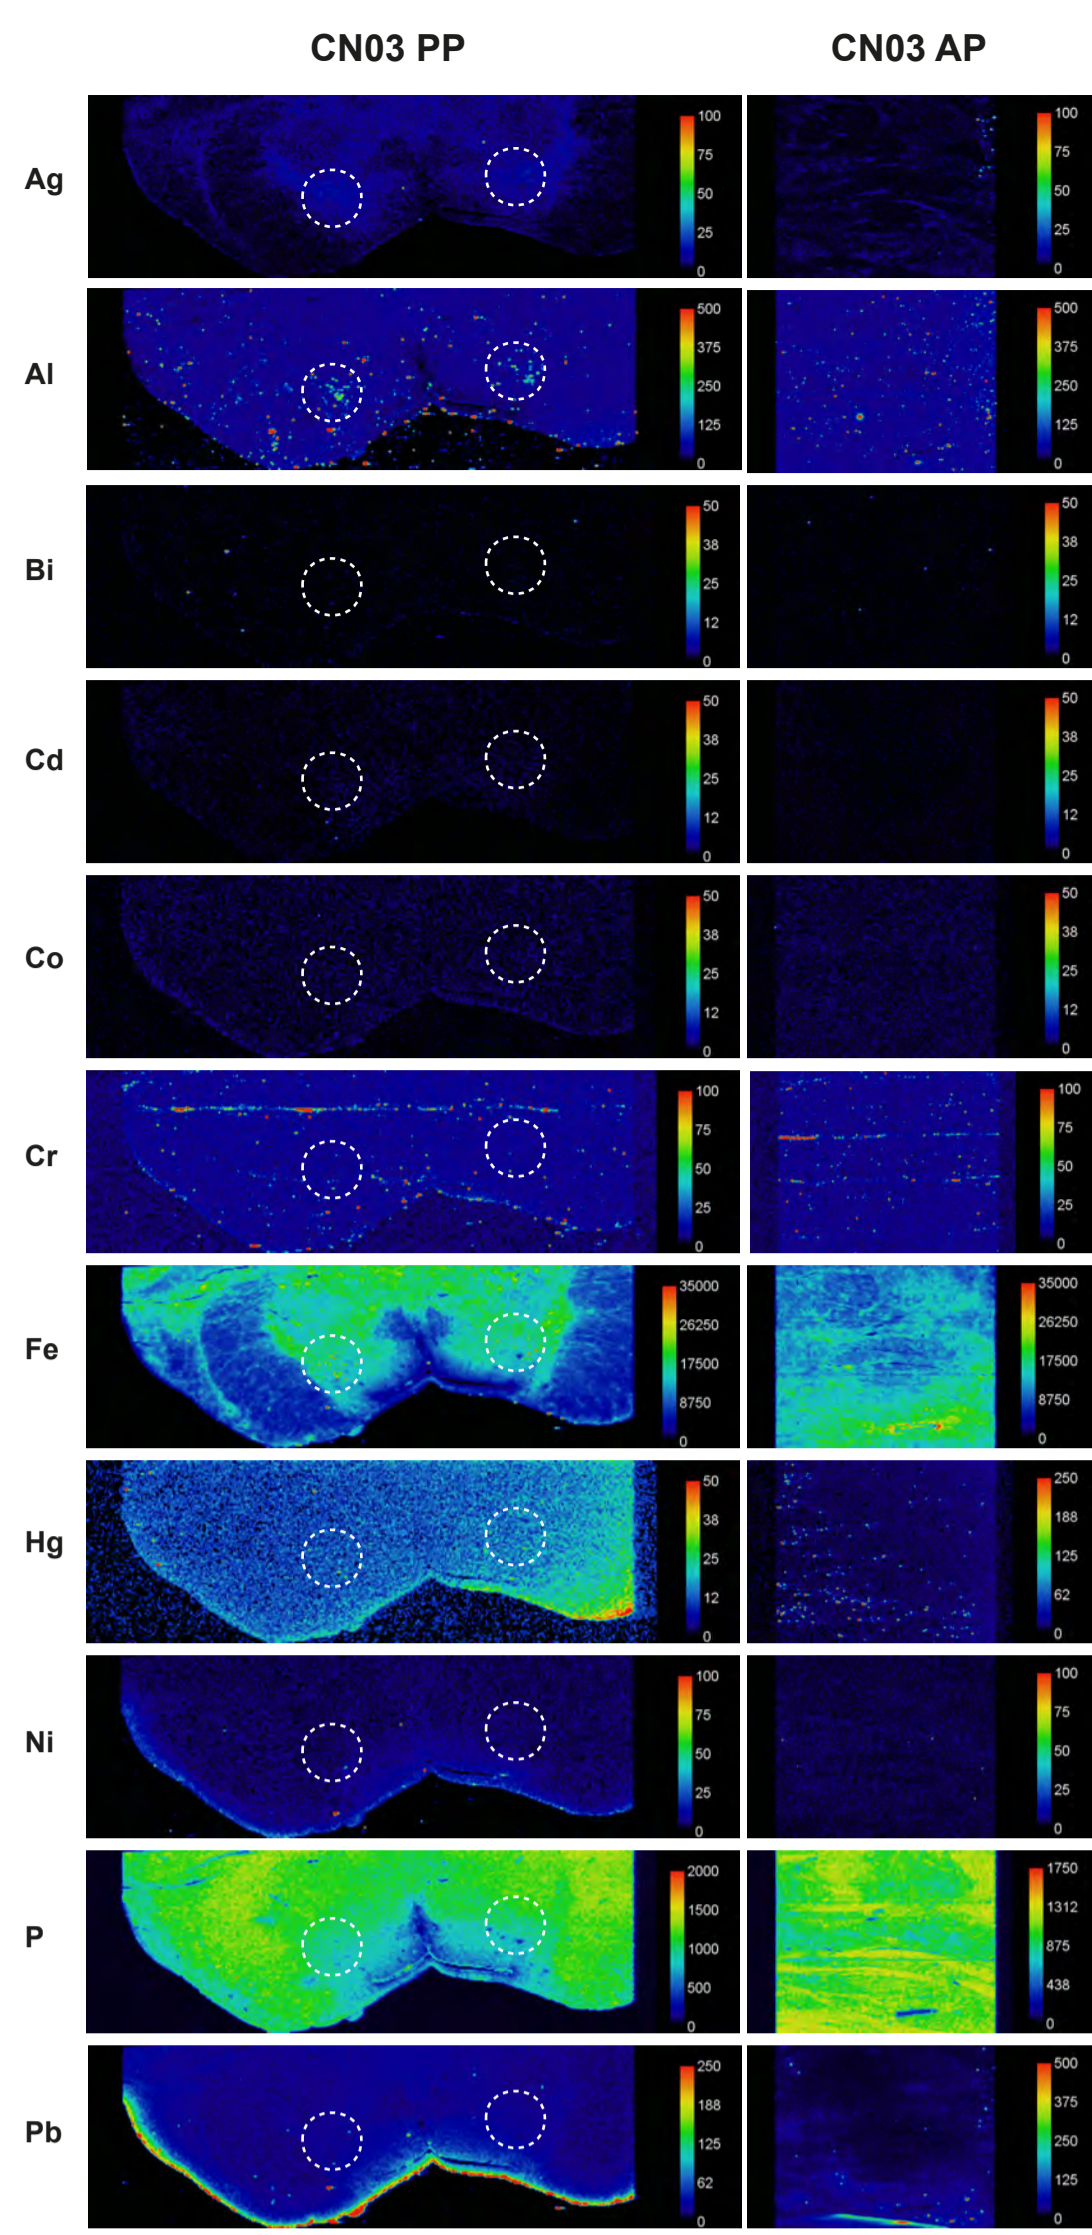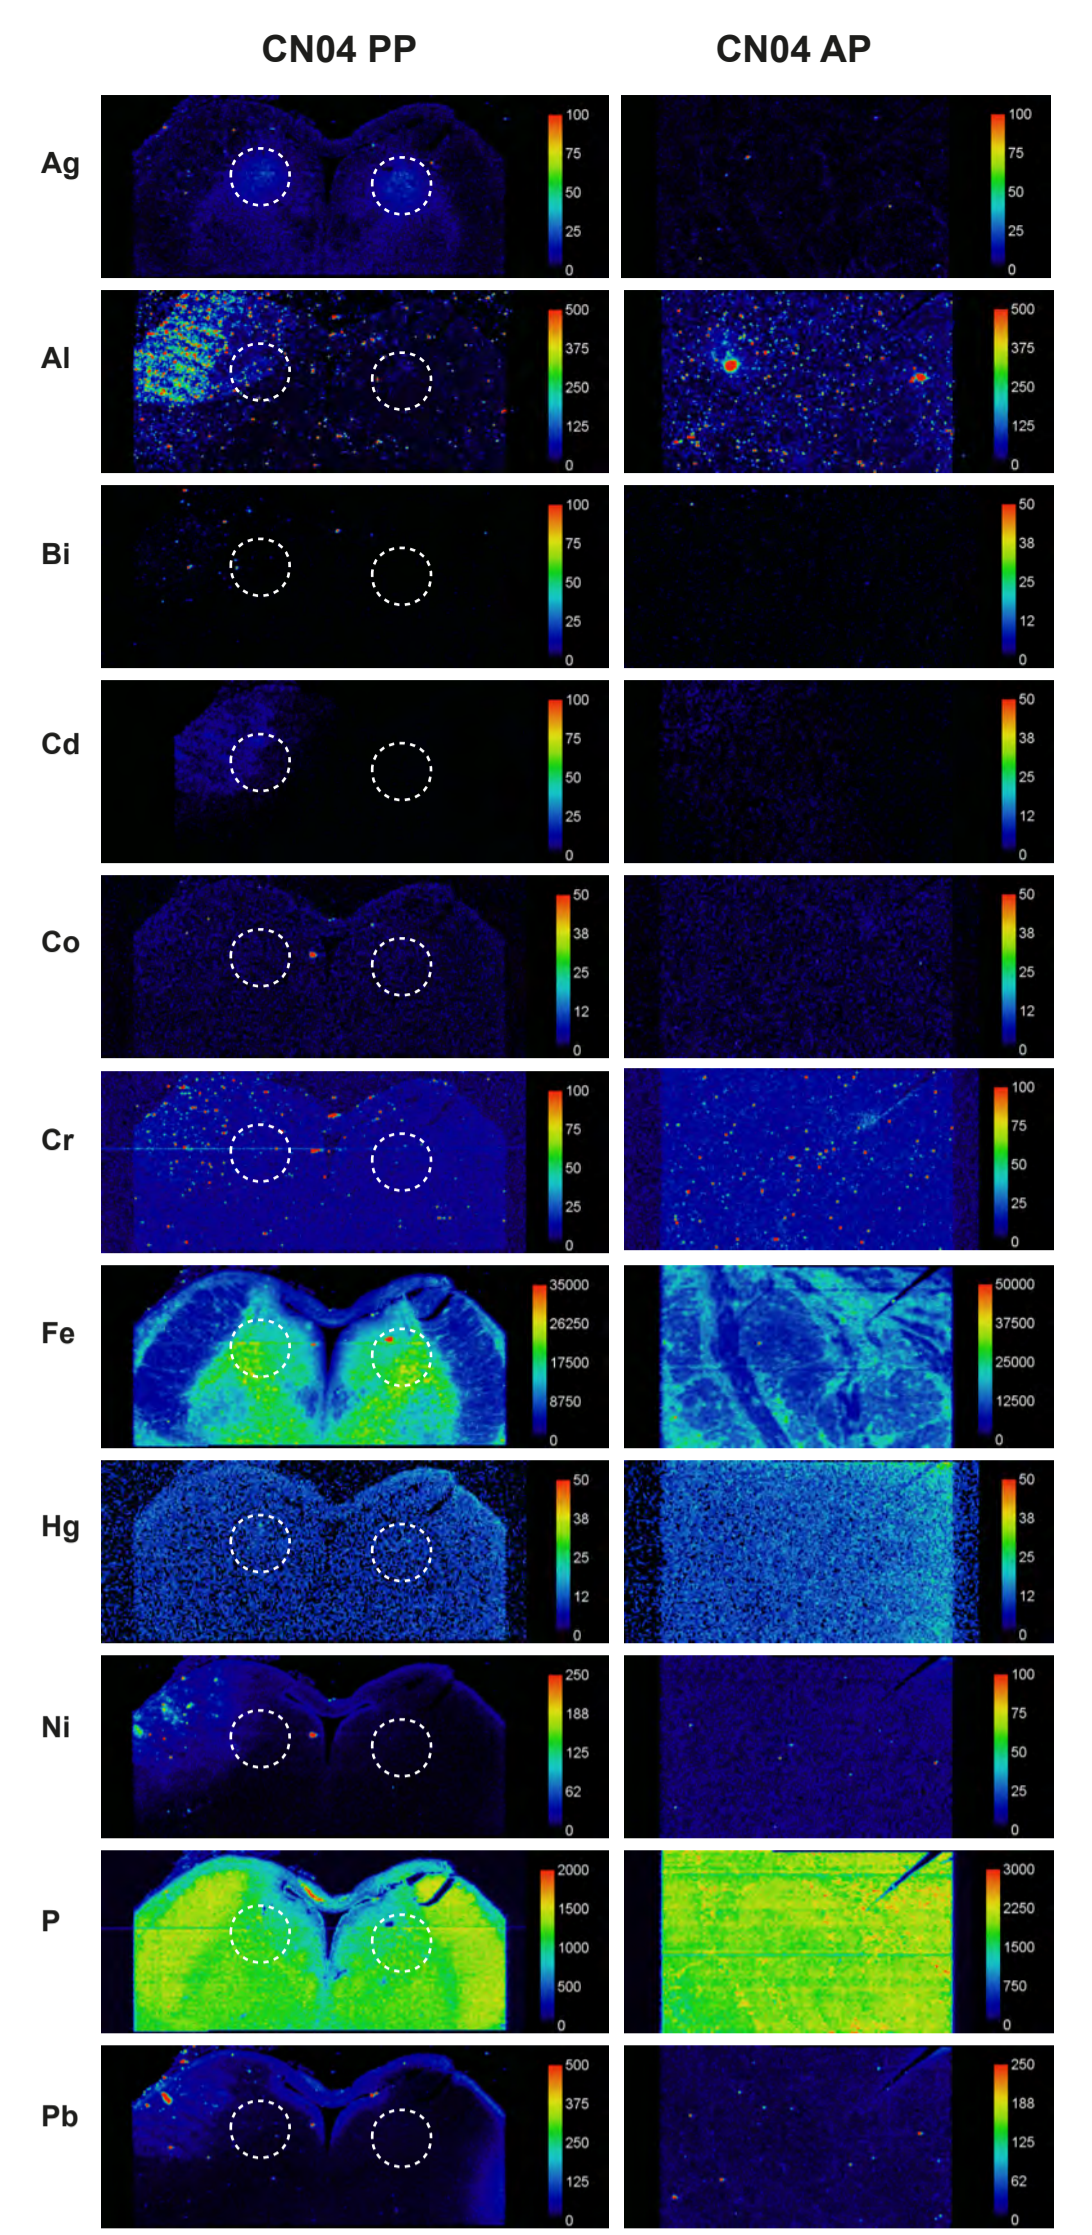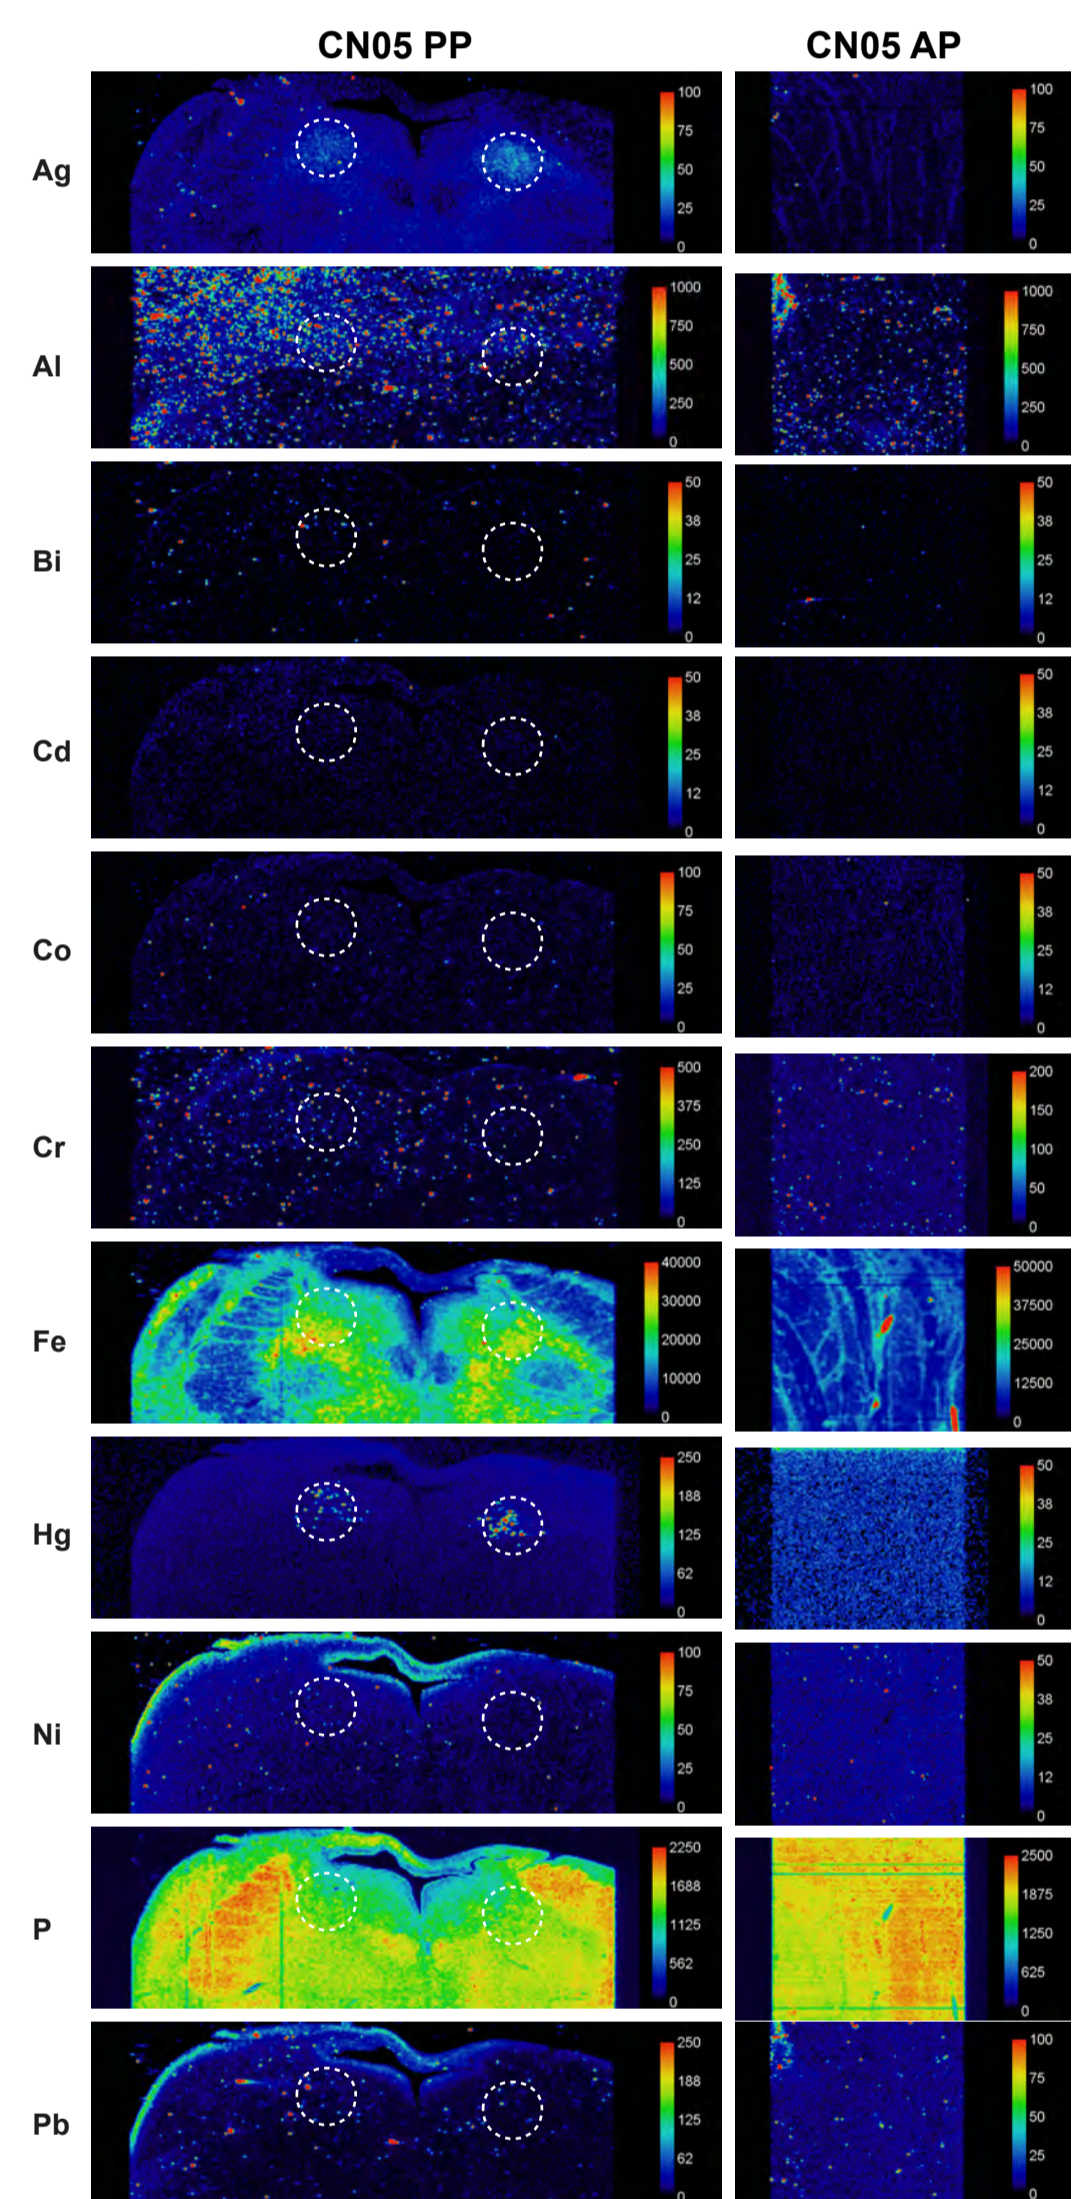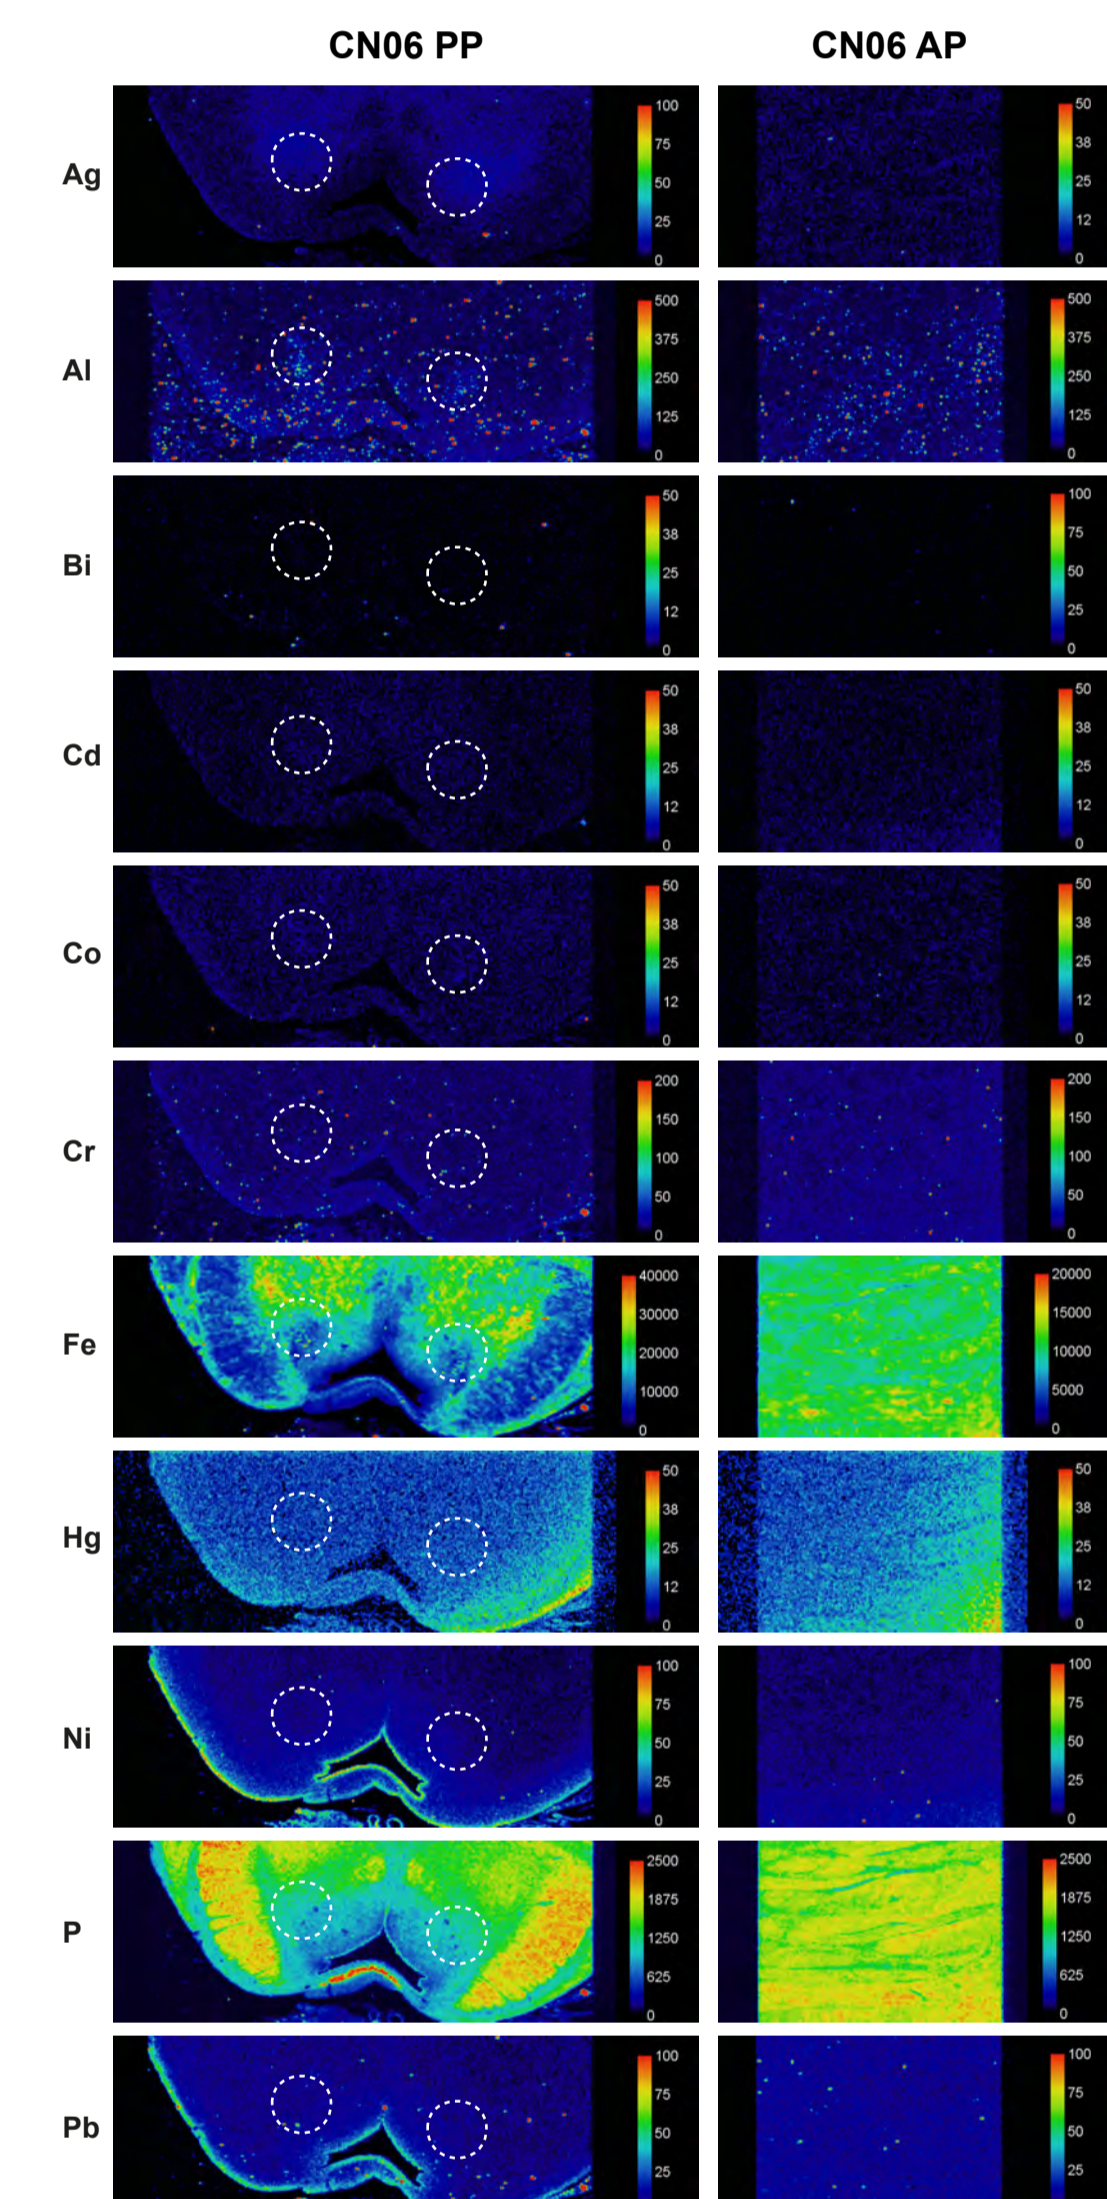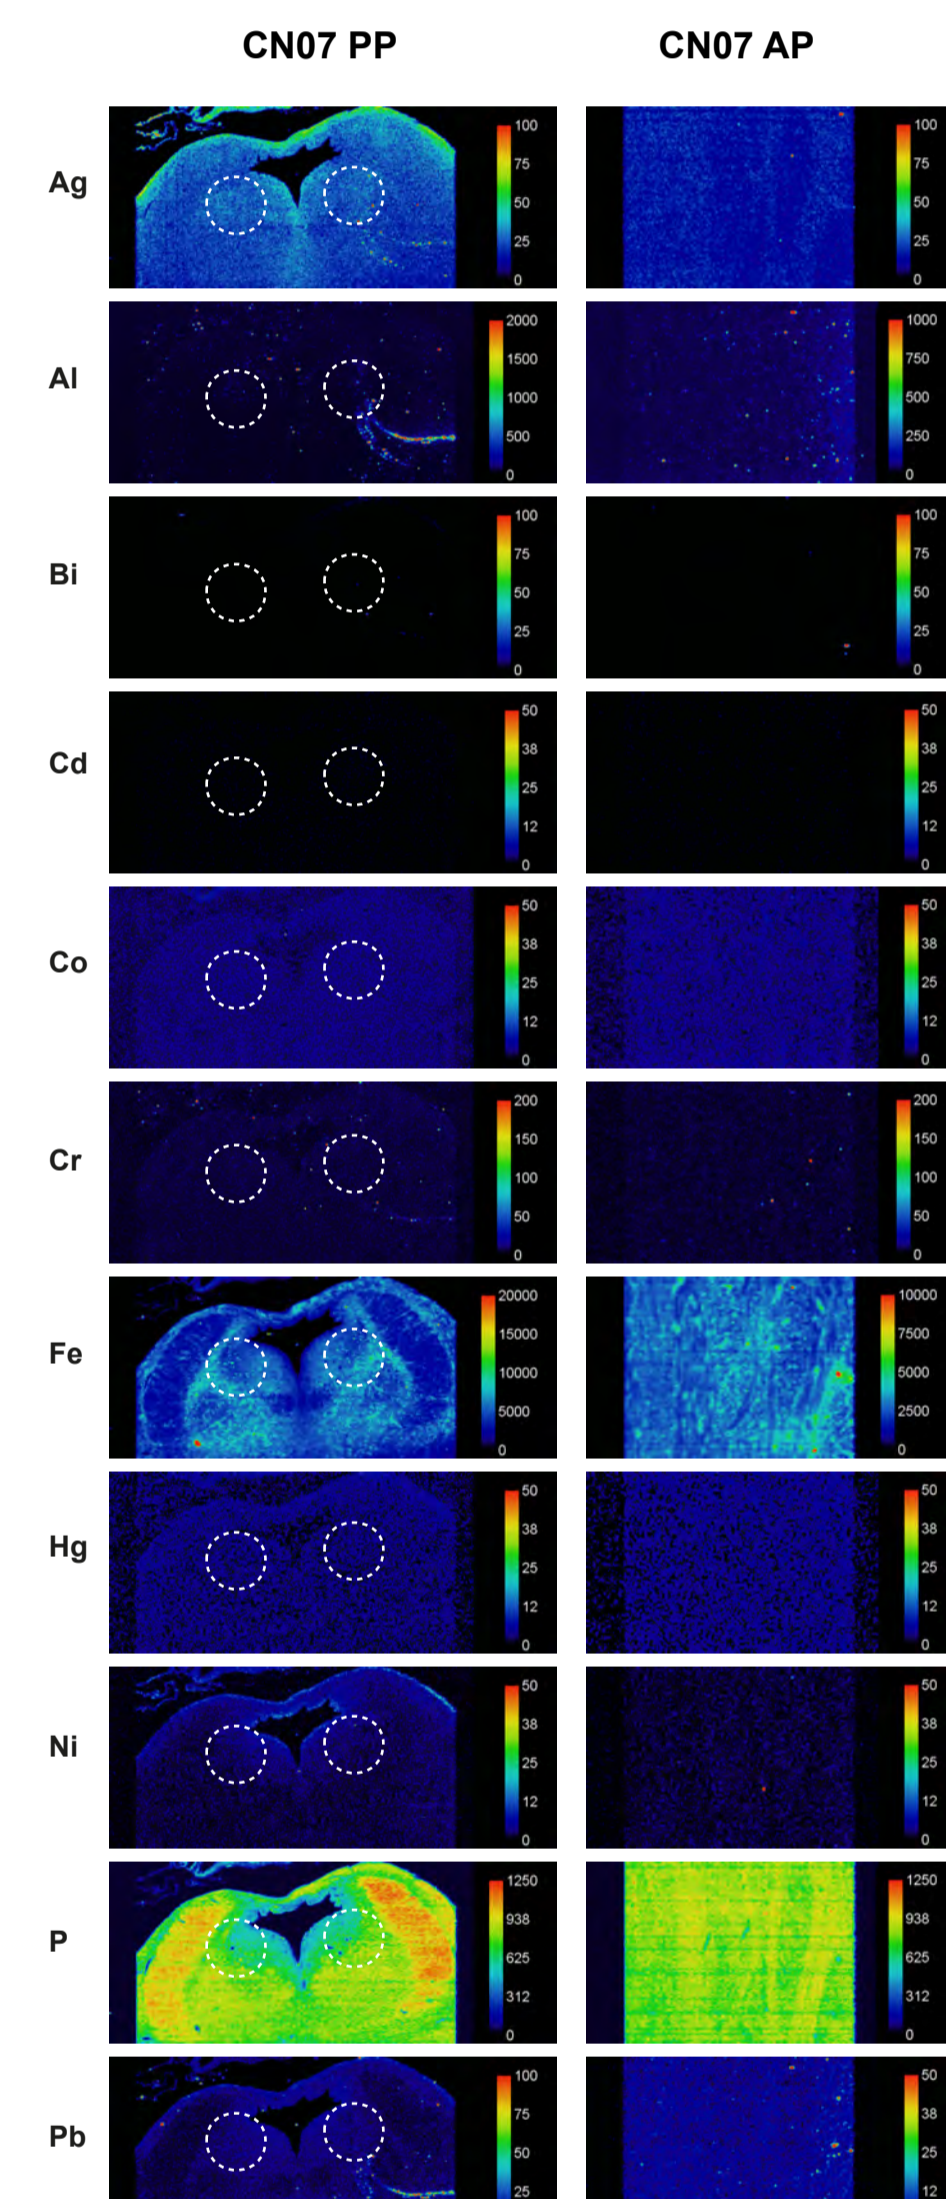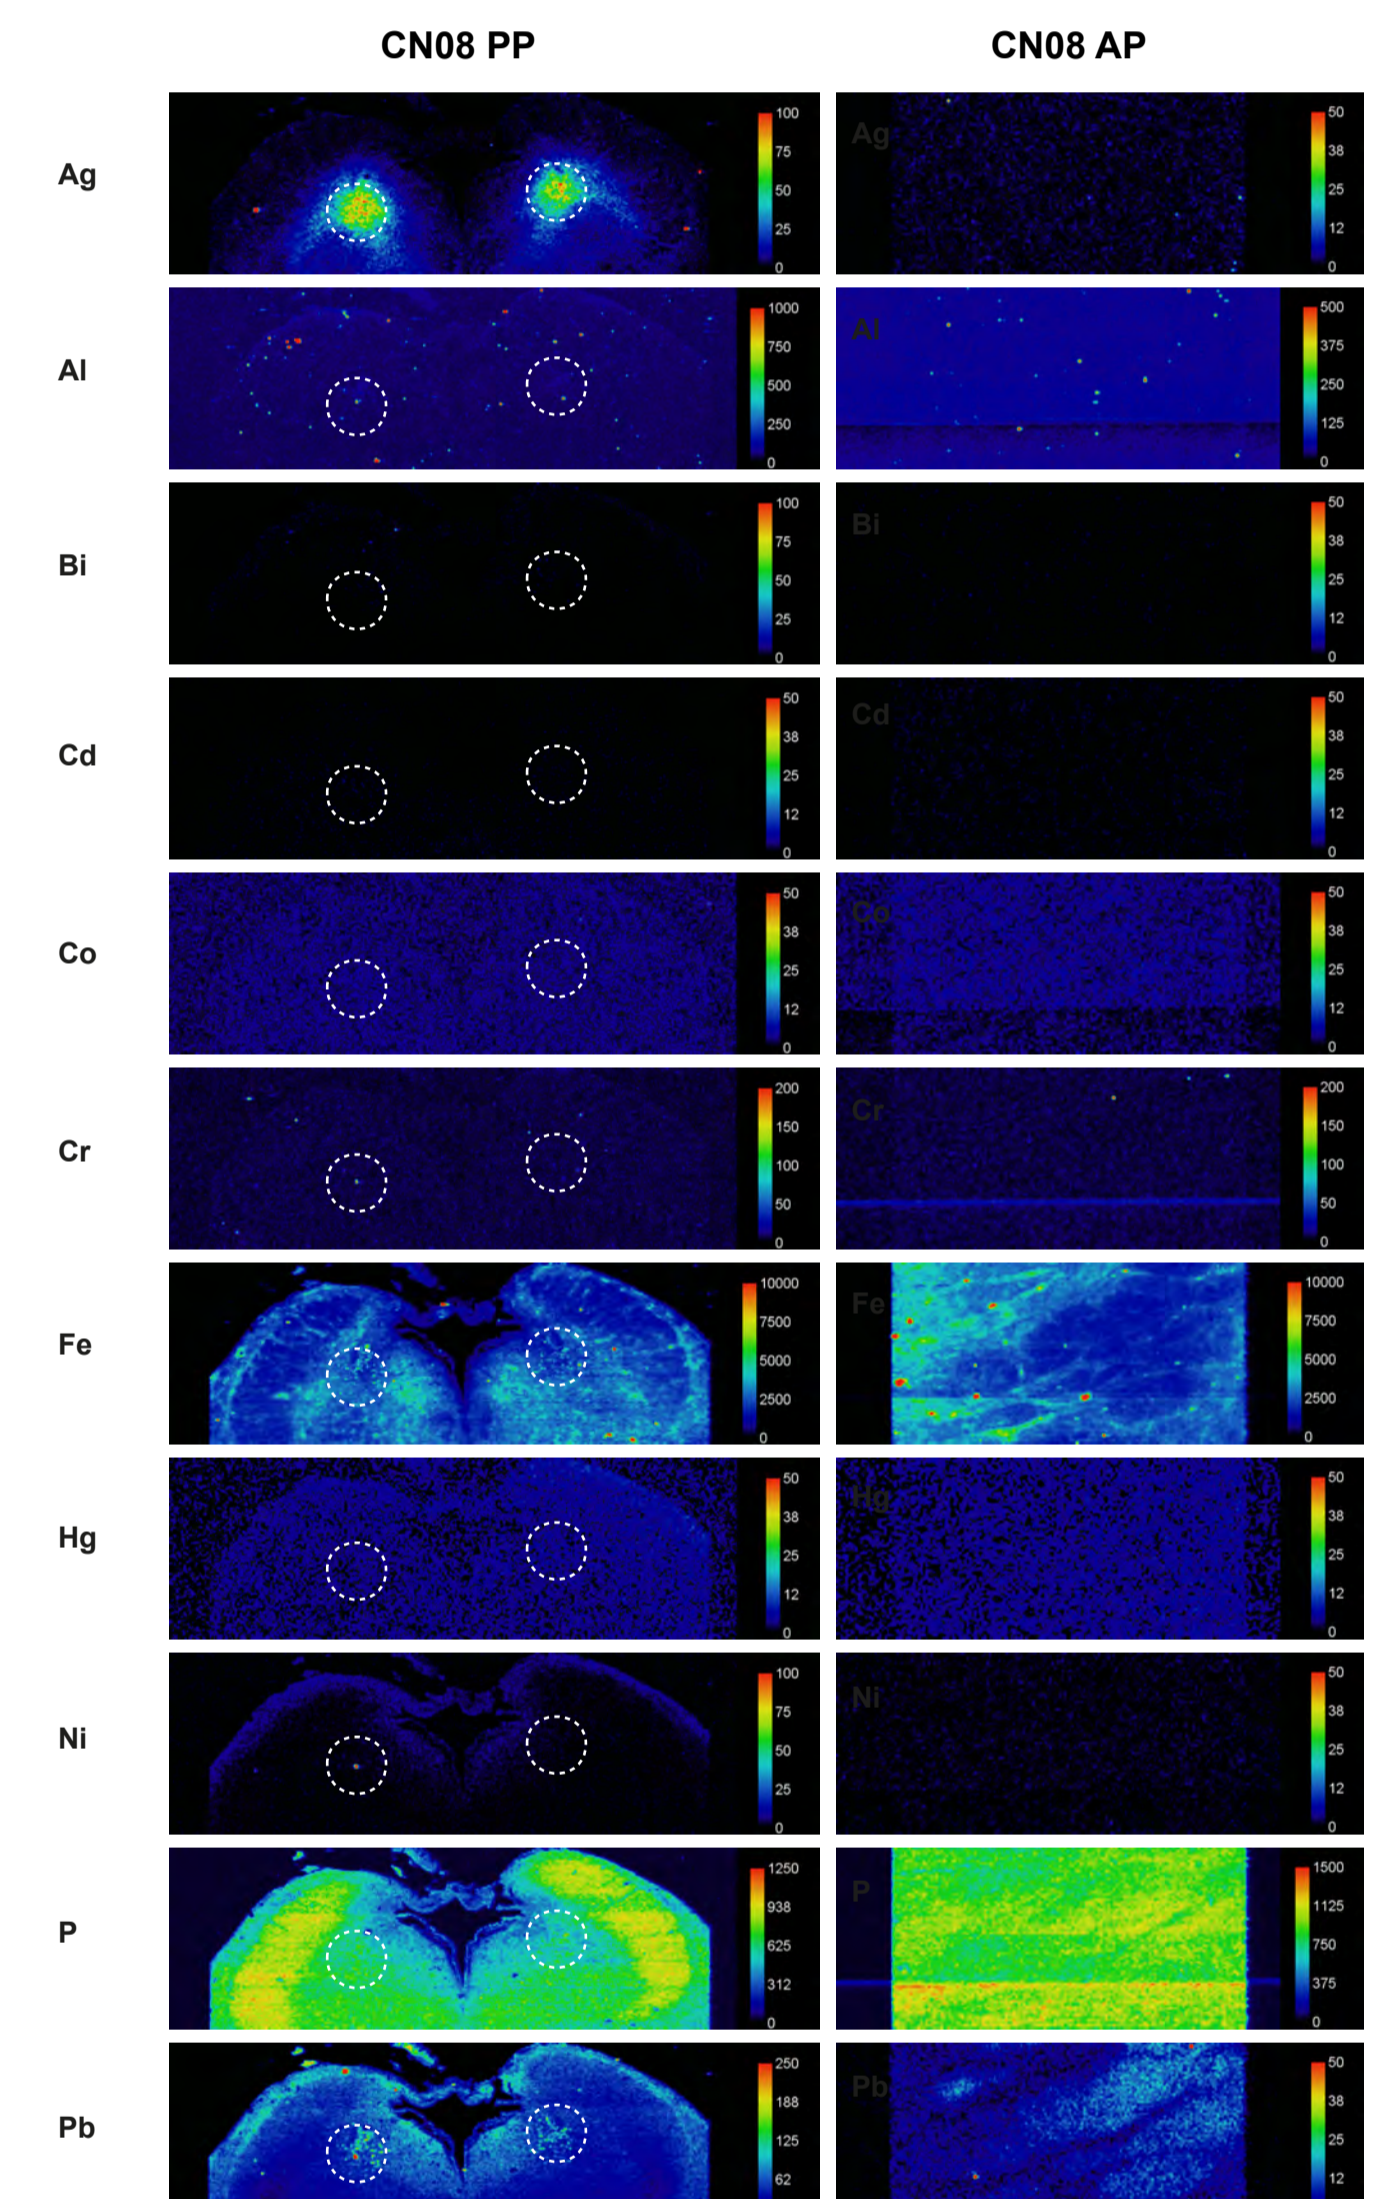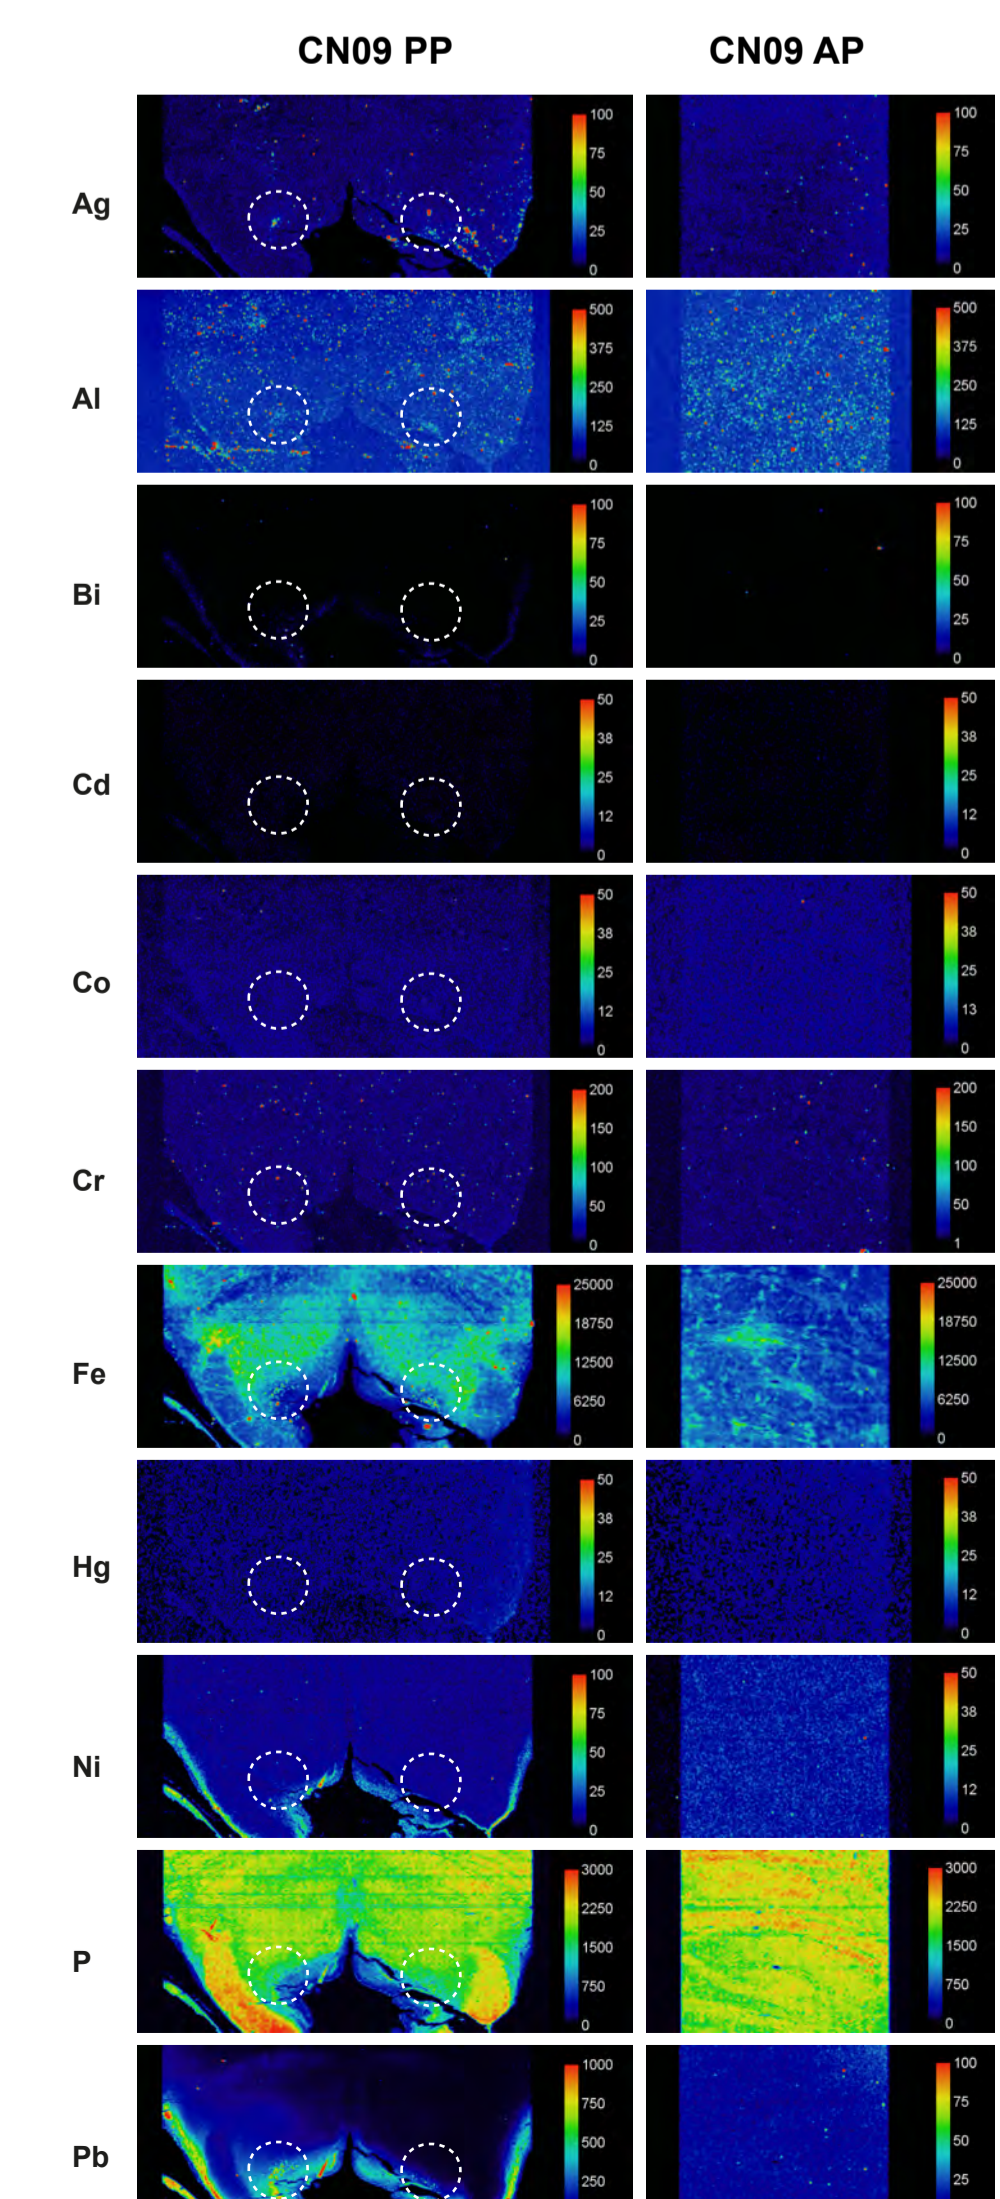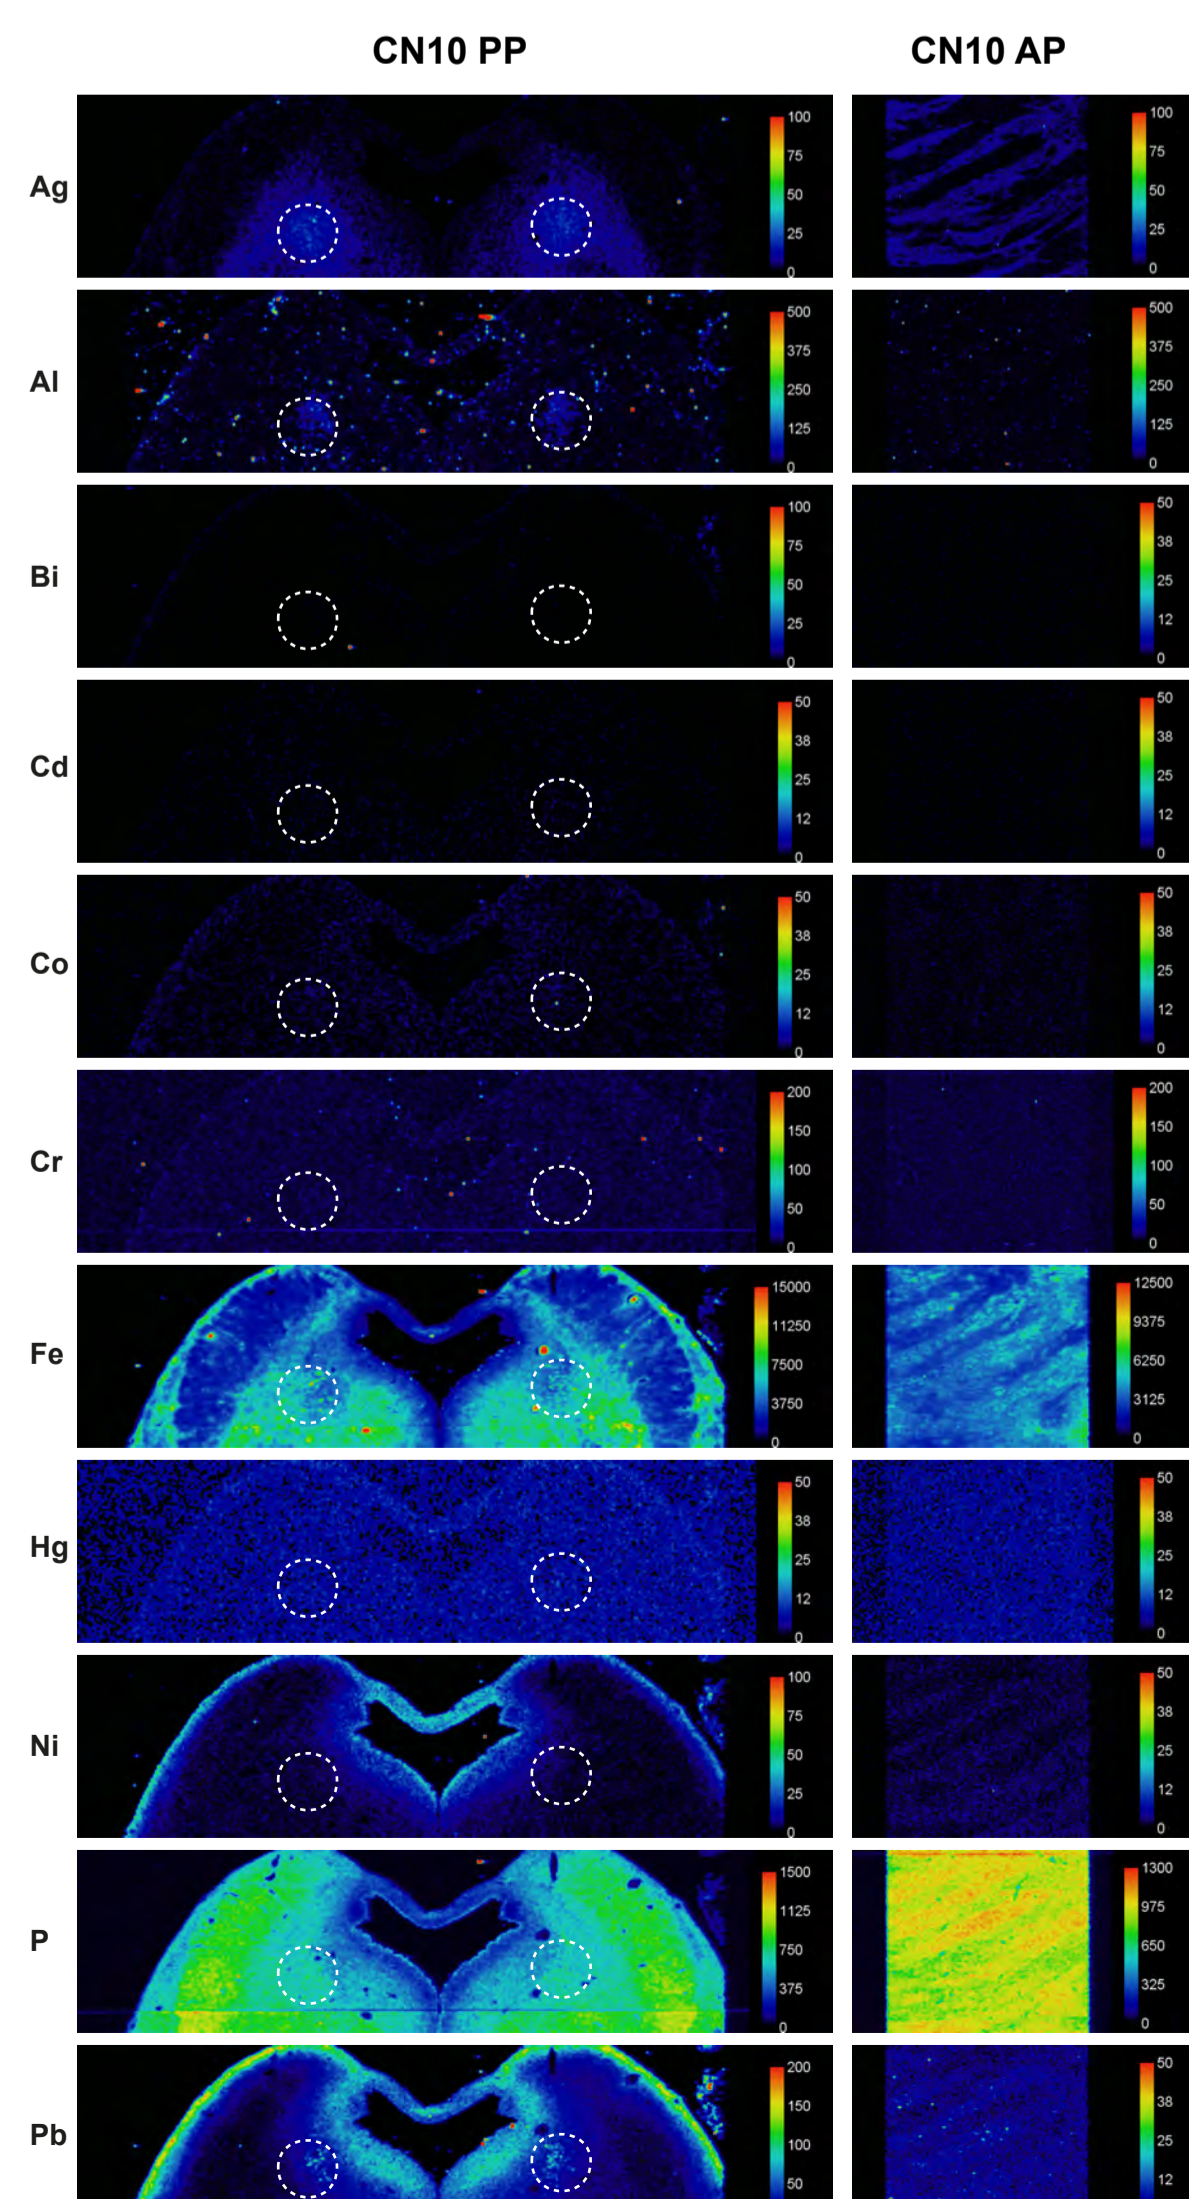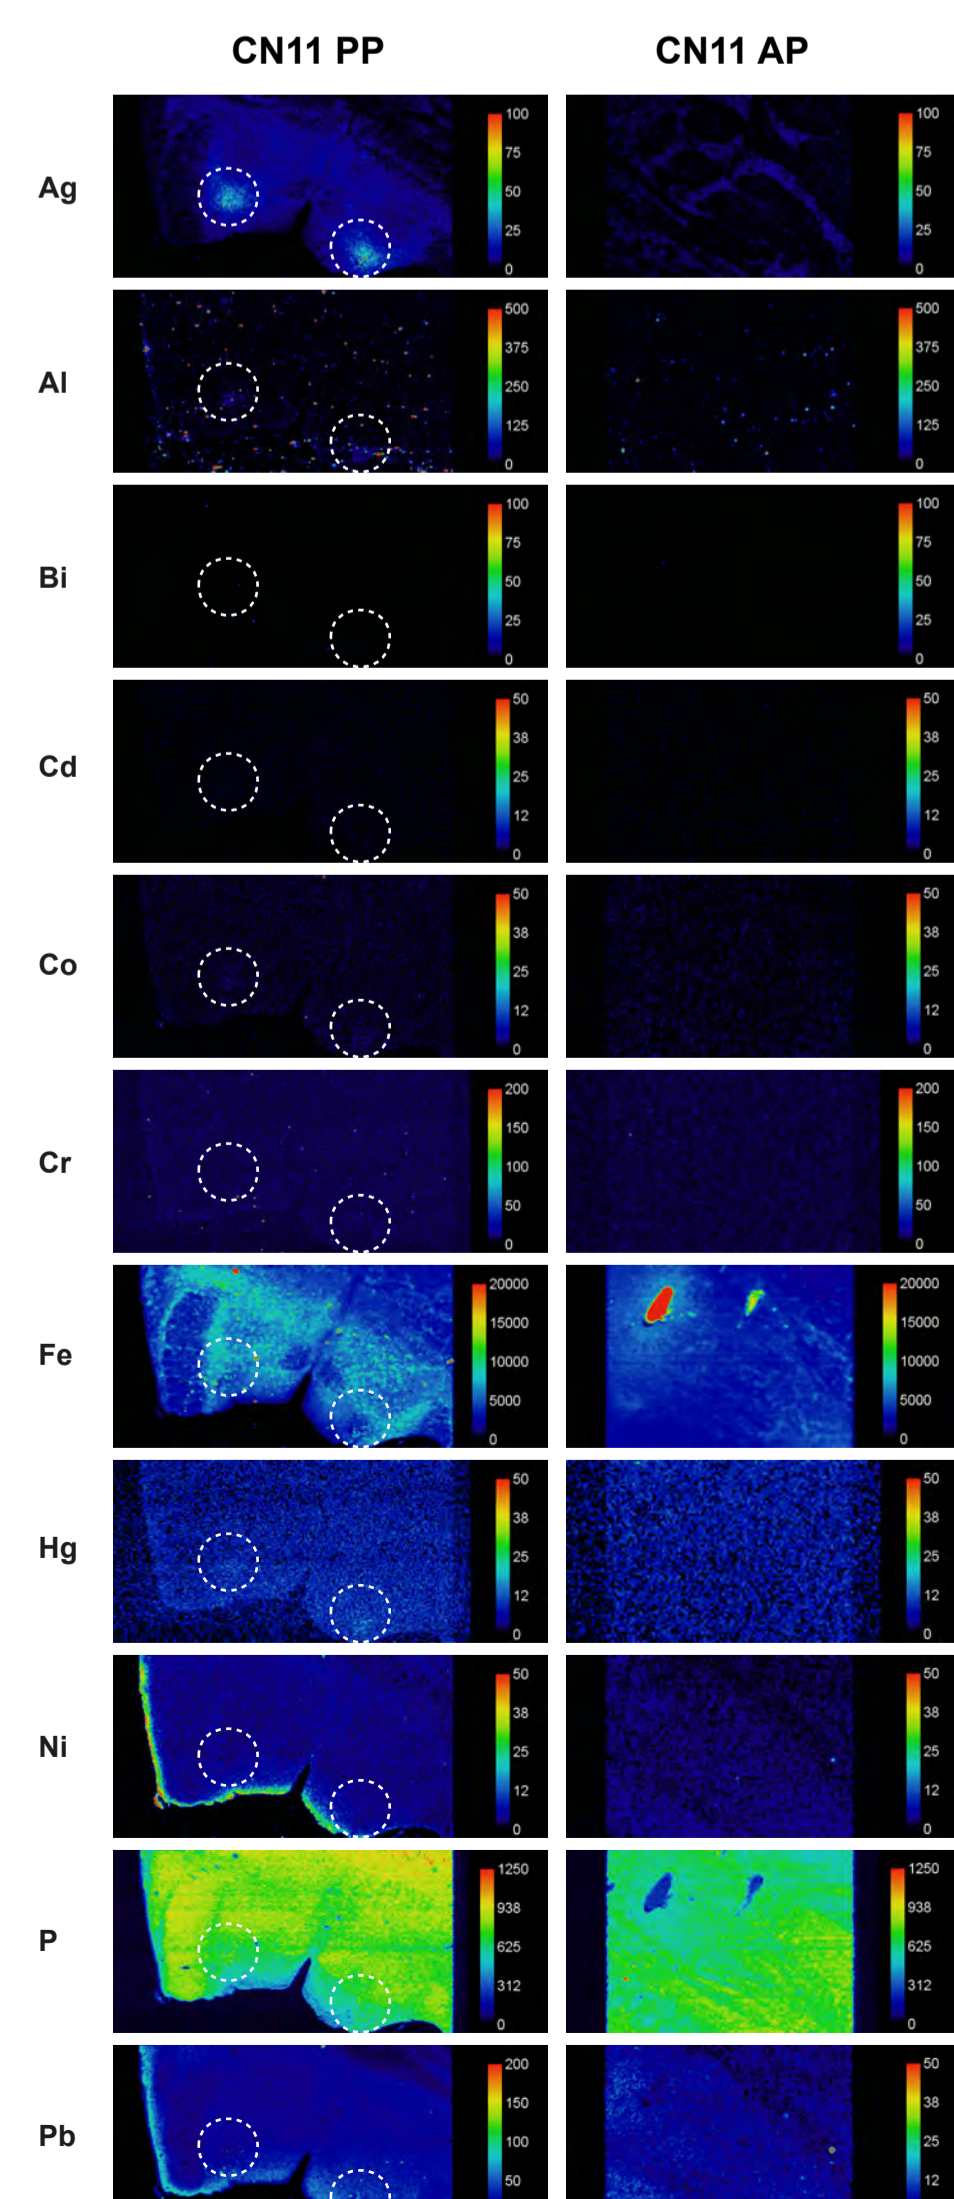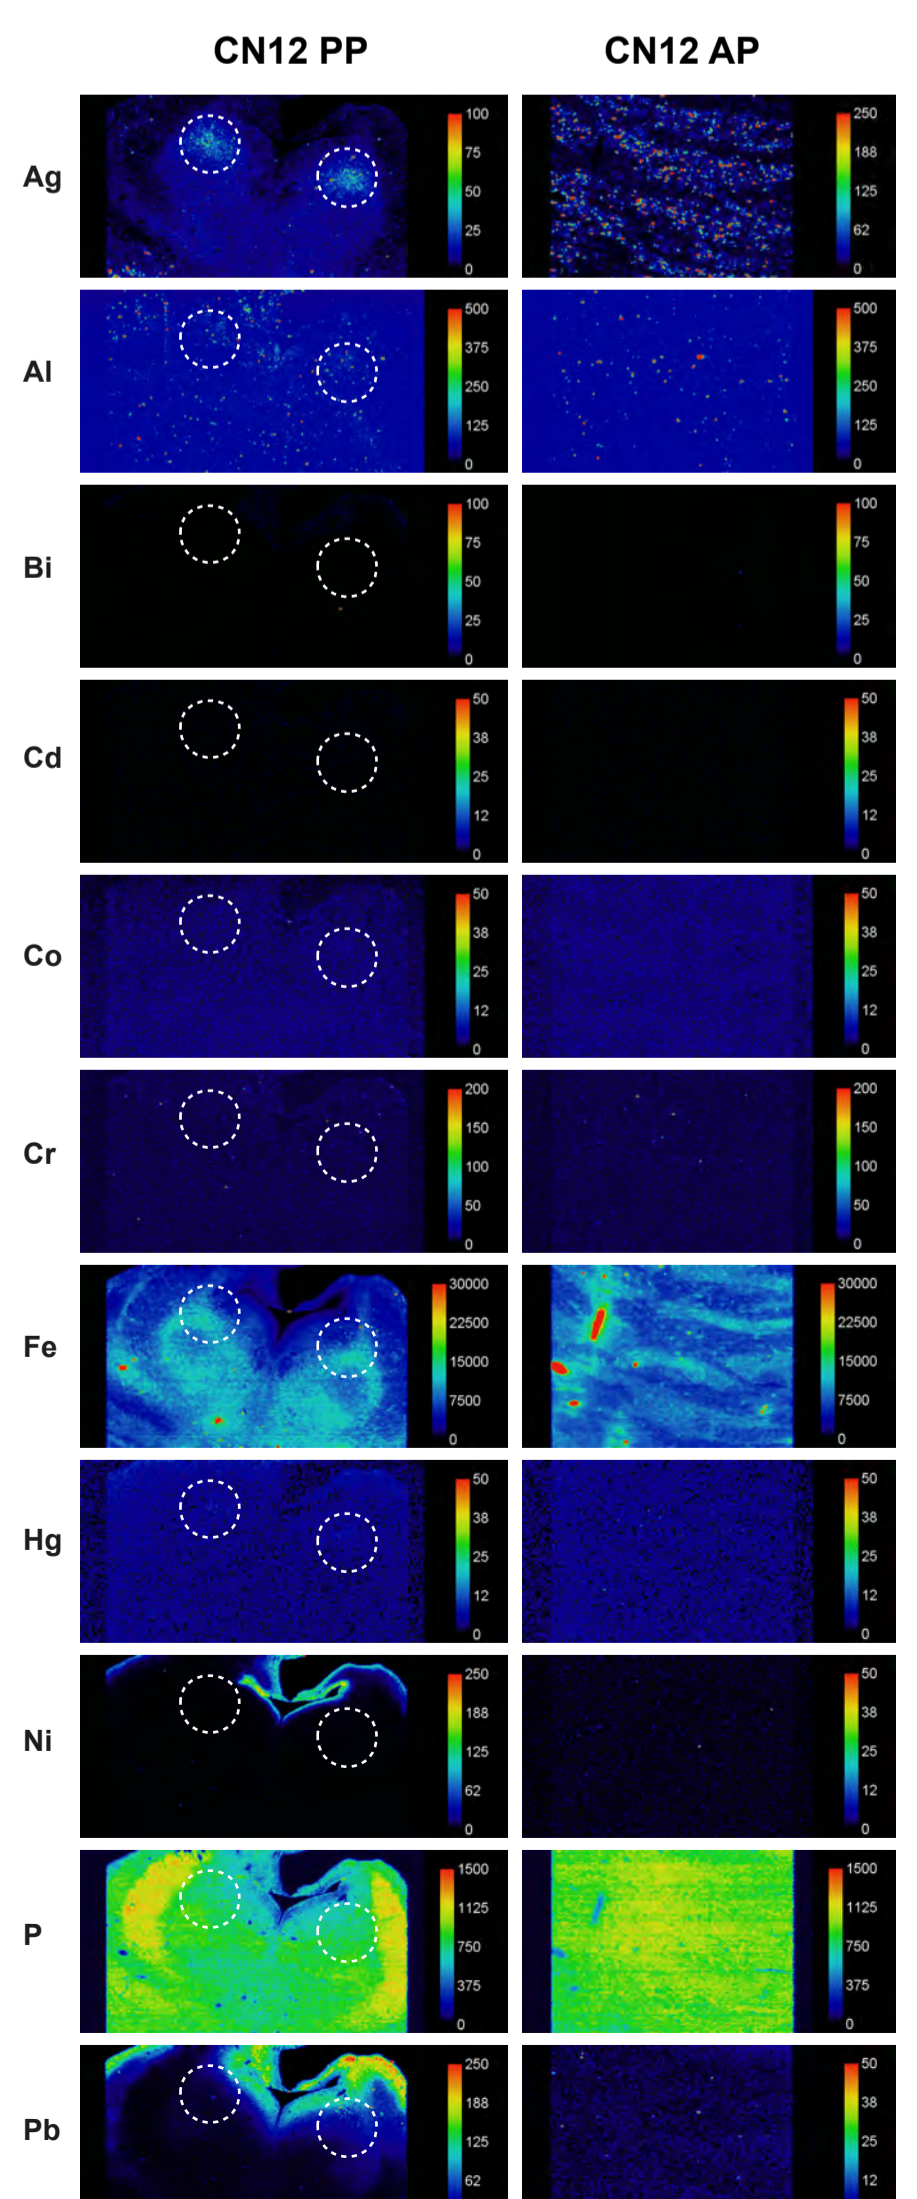

Supplement: 41598_2022_27169_MOESM2_ESM.pdf [file 41598_2022_27169_MOESM2_ESM.pdf]
